# Supplementary material for: Gastric Cancer Associated Genes Identified by an Integrative Analysis of Gene Expression Data
Source: Hindawi journal article supplement (doi:10.1155/2017/7259097), 2017-01-01
Supplement: f1 [file 7259097.f1.pdf]

**Table S1:Information for differentially expressed genes**

| EntrezID | Name         | CombinedRP  | AveLogFC     | Pval |
|----------|--------------|-------------|--------------|------|
| 5225     | PGC          | 22.37618865 | 14454.4758   | 0    |
| 57016    | AKR1B10      | 22.86226955 | 6705.557765  | 0    |
| 9992     | KCNE2        | 36.08428177 | 4314.327905  | 0    |
| 284340   | CXCL17       | 49.18093279 | 3880.567262  | 0    |
| 135656   | DPCR1        | 55.94229823 | 1892.035059  | 0    |
| 51208    | CLDN18       | 57.3490307  | 3435.259165  | 0    |
| 1293     | COL6A3       | 59.02243551 | -3600.958417 | 0    |
| 1278     | COL1A2       | 62.06096885 | -3576.205929 | 0    |
| 3512     | IGJ          | 62.80941701 | 25978.0491   | 0    |
| 1510     | CTSE         | 64.51216896 | 4631.280569  | 0    |
| 340547   | VSIG1        | 69.66145697 | 1752.542251  | 0    |
| 4499     | MT1M         | 100.5789863 | 6787.140047  | 0    |
| 6947     | TCN1         | 102.9607134 | 3564.358317  | 0    |
| 768239   | PSAPL1       | 119.7813568 | 716.9719191  | 0    |
| 148808   | MFSD4        | 143.5568227 | 1677.560594  | 0    |
| 10562    | OLFM4        | 150.666316  | -3542.760536 | 0    |
| 7058     | THBS2        | 163.6563202 | -24.03016606 | 0    |
| 4496     | MT1H         | 167.5049606 | 7238.419671  | 0    |
| 115908   | CTHRC1       | 174.6147569 | -1204.55627  | 0    |
| 218      | ALDH3A1      | 182.2048868 | 686.0077727  | 0    |
| 3485     | IGFBP2       | 182.8744446 | 13742.24761  | 0    |
| 3490     | IGFBP7       | 186.014491  | 34075.26854  | 0    |
| 51316    | PLAC8        | 188.2023566 | 2091.586406  | 0    |
| 6750     | SST          | 191.8200648 | 924.4507777  | 0    |
| 563      | AZGP1        | 200.2215467 | 2030.55507   | 0    |
| 4680     | CEACAM6      | 203.7822599 | -2542.020962 | 0    |
| 1E+08    | LOC100128893 | 205.7947701 | 721.3237822  | 0    |
| 361      | AQP4         | 213.4236361 | 381.7968368  | 0    |
| 4477     | MSMB         | 215.5581823 | 368.5352109  | 0    |
| 3624     | INHBA        | 219.1191635 | -368.6945035 | 0    |
| 115019   | SLC26A9      | 221.4676235 | 507.0154925  | 0    |
| 1290     | COL5A2       | 230.7153285 | -1064.684233 | 0    |
| 4118     | MAL          | 235.2413774 | 563.5230939  | 0    |
| 871      | SERPINH1     | 243.2433433 | 1303.849567  | 0    |
| 54829    | ASPN         | 255.1487608 | -237.0489505 | 0    |
| 94234    | FOXQ1        | 258.025839  | 2037.743693  | 0    |
| 1300     | COL10A1      | 259.1455696 | 142.5328954  | 0    |
| 388743   | CAPN8        | 263.2566507 | 892.3456491  | 0    |
| 2191     | FAP          | 263.5453973 | 325.3248559  | 0    |
| 83641    | FAM107B      | 268.4392172 | 1693.368707  | 0    |
| 151556   | GPR155       | 273.2188057 | 7056.514842  | 0    |

|        |          |             |              |   |
|--------|----------|-------------|--------------|---|
| 1051   | CEBPB    | 274.7527146 | 1469.58243   | 0 |
| 51738  | GHRL     | 278.1721779 | 711.0985409  | 0 |
| 1366   | CLDN7    | 288.091328  | -356.7123433 | 0 |
| 1160   | CKMT2    | 288.4004573 | 480.0402009  | 0 |
| 3397   | ID1      | 289.7714528 | 8818.451709  | 0 |
| 80117  | ARL14    | 298.3392322 | 637.3716819  | 0 |
| 7060   | THBS4    | 300.587765  | -2159.605376 | 0 |
| 10398  | MYL9     | 302.4357263 | -1624.112929 | 0 |
| 1301   | COL11A1  | 307.753111  | -200.7780742 | 0 |
| 2752   | GLUL     | 314.0056913 | 997.2484898  | 0 |
| 7178   | TPT1     | 317.0341531 | 22378.46889  | 0 |
| 6038   | RNASE4   | 323.022807  | 1165.43795   | 0 |
| 6277   | S100A6   | 323.2144571 | 2925.824666  | 0 |
| 11012  | KLK11    | 323.5516353 | 908.1171728  | 0 |
| 4256   | MGP      | 324.839462  | 4868.187762  | 0 |
| 9314   | KLF4     | 327.7241393 | 1037.077622  | 0 |
| 3043   | HBB      | 328.1106829 | 3729.291692  | 0 |
| 6281   | S100A10  | 331.4706182 | 2393.424753  | 0 |
| 633    | BGN      | 334.7641809 | -488.4944655 | 0 |
| 80157  | CWH43    | 343.1186487 | 66.06613347  | 0 |
| 8789   | FBP2     | 343.4595549 | 197.7399521  | 0 |
| 7045   | TGFBI    | 346.9860556 | 707.3673564  | 0 |
| 1562   | CYP2C18  | 347.8602526 | 599.9397693  | 0 |
| 5873   | RAB27A   | 347.9424335 | 704.2401073  | 0 |
| 2638   | GC       | 362.1821298 | 2830.681529  | 0 |
| 4316   | MMP7     | 364.1095701 | 5255.562378  | 0 |
| 1289   | COL5A1   | 365.7385612 | -637.6419615 | 0 |
| 166824 | RASSF6   | 366.6317873 | 517.5700126  | 0 |
| 5176   | SERPINF1 | 370.0868974 | 194.7832118  | 0 |
| 7850   | IL1R2    | 371.6686883 | 520.6878701  | 0 |
| 6696   | SPP1     | 372.0992078 | 2411.297896  | 0 |
| 7009   | TMBIM6   | 373.3980261 | 7400.765217  | 0 |
| 4246   | SCGB2A1  | 380.8103872 | 182.6352179  | 0 |
| 145226 | RDH12    | 387.9837516 | 237.8785805  | 0 |
| 27089  | UQCRCQ   | 389.5120332 | 2486.882075  | 0 |
| 5827   | PXMP2    | 391.5122595 | 1008.958566  | 0 |
| 56937  | PMEPA1   | 395.8150757 | -62.22753302 | 0 |
| 51092  | SIDT2    | 396.3767796 | 1047.291791  | 0 |
| 6135   | RPL11    | 403.6727751 | 12273.77413  | 0 |
| 25924  | MYRIP    | 407.0448727 | 692.0272796  | 0 |
| 11224  | RPL35    | 413.1613432 | 7233.879526  | 0 |
| 2495   | FTH1     | 414.2453924 | 13061.73601  | 0 |
| 3772   | KCNJ15   | 416.7739259 | 501.9603381  | 0 |
| 1528   | CYB5A    | 419.788193  | 4465.193627  | 0 |

|        |          |             |              |   |
|--------|----------|-------------|--------------|---|
| 3315   | HSPB1    | 420.0690883 | -285.1450513 | 0 |
| 1001   | CDH3     | 421.8605855 | -209.0090764 | 0 |
| 1E+08  | CD24     | 424.6185776 | 12370.22622  | 0 |
| 3206   | HOXA10   | 425.0689898 | -136.9562623 | 0 |
| 3939   | LDHA     | 432.4720559 | -1785.338595 | 0 |
| 72     | ACTG2    | 432.7795175 | -73130.01133 | 0 |
| 608    | TNFRSF17 | 438.9461199 | 595.6216124  | 0 |
| 3320   | HSP90AA1 | 439.8045153 | 2049.914531  | 0 |
| 5874   | RAB27B   | 443.4152464 | 396.8587261  | 0 |
| 1508   | CTSB     | 444.222131  | 2833.606659  | 0 |
| 6170   | RPL39    | 444.3414818 | 30555.13675  | 0 |
| 11261  | CHP      | 445.1447612 | 3974.466463  | 0 |
| 567    | B2M      | 446.3136934 | 14814.68772  | 0 |
| 10410  | IFITM3   | 447.2490932 | 6355.584436  | 0 |
| 6414   | SEPP1    | 452.5851874 | 5411.334359  | 0 |
| 23673  | STX12    | 457.0556232 | 765.3947708  | 0 |
| 2266   | FGG      | 467.2960973 | 5549.107508  | 0 |
| 6223   | RPS19    | 472.1547307 | 13891.28448  | 0 |
| 8527   | DGKD     | 474.9579215 | 665.7060417  | 0 |
| 9528   | TMEM59   | 477.7260607 | 3931.566259  | 0 |
| 10417  | SPON2    | 479.2822528 | 1182.569186  | 0 |
| 4190   | MDH1     | 479.3161294 | 1078.788032  | 0 |
| 4837   | NNMT     | 480.117735  | 2341.231258  | 0 |
| 6175   | RPLP0    | 481.4288327 | 9694.367575  | 0 |
| 229    | ALDOB    | 481.8952428 | 12321.35332  | 0 |
| 4637   | MYL6     | 483.7620954 | -5402.915863 | 0 |
| 1015   | CDH17    | 484.5930035 | -560.8043541 | 0 |
| 54843  | SYTL2    | 489.6934599 | 674.1140158  | 0 |
| 347902 | AMIGO2   | 495.7421904 | -634.5196665 | 0 |
| 716    | C1S      | 496.5487763 | 6679.410438  | 0 |
| 56605  | ER01LB   | 496.6806875 | 514.1477214  | 0 |
| 131    | ADH7     | 497.3864425 | 51.34773705  | 0 |
| 2243   | FGA      | 501.1460843 | 850.1670341  | 0 |
| 79589  | RNF128   | 503.1161747 | 638.4356676  | 0 |
| 768211 | RELL1    | 503.5513347 | 963.535226   | 0 |
| 55450  | CAMK2N1  | 510.2878213 | -54.43502851 | 0 |
| 121512 | FGD4     | 511.8432571 | 472.2547446  | 0 |
| 4312   | MMP1     | 512.0460389 | -573.4642993 | 0 |
| 23588  | KLHDC2   | 517.1190861 | 1203.782717  | 0 |
| 5068   | REG3A    | 517.6448362 | 616.8680019  | 0 |
| 3576   | IL8      | 520.5120194 | -289.5853247 | 0 |
| 81610  | FAM83D   | 523.622869  | -3000.498013 | 0 |
| 4582   | MUC1     | 530.9815269 | 659.149953   | 0 |
| 2697   | GJA1     | 532.8309415 | -1258.957948 | 0 |

|        |           |             |              |   |
|--------|-----------|-------------|--------------|---|
| 6822   | SULT2A1   | 533.7645559 | 484.6713724  | 0 |
| 114132 | SIGLEC11  | 535.4573469 | 197.6279075  | 0 |
| 6136   | RPL12     | 537.3100488 | 19988.43346  | 0 |
| 7314   | UBB       | 537.6338135 | 7925.213429  | 0 |
| 1164   | CKS2      | 543.6452358 | -560.5486025 | 0 |
| 1295   | COL8A1    | 544.6490004 | -256.2226424 | 0 |
| 8801   | SUCLG2    | 544.9432642 | 637.6902076  | 0 |
| 6147   | RPL23A    | 544.9969496 | 14376.48677  | 0 |
| 6695   | SPOCK1    | 547.6738891 | -254.6791322 | 0 |
| 285016 | FAM150B   | 549.2025319 | 1146.882966  | 0 |
| 9076   | CLDN1     | 550.4484326 | 1082.605353  | 0 |
| 1292   | COL6A2    | 554.5627944 | -486.304655  | 0 |
| 9235   | IL32      | 554.8033939 | 1554.998766  | 0 |
| 1915   | EEF1A1    | 554.9880527 | 10627.67369  | 0 |
| 80310  | PDGFD     | 560.4664486 | 847.3630009  | 0 |
| 2982   | GUCY1A3   | 563.783979  | -303.8166043 | 0 |
| 10549  | PRDX4     | 567.330684  | 1999.029099  | 0 |
| 25824  | PRDX5     | 569.0631721 | 1871.294541  | 0 |
| 3373   | HYAL1     | 577.7981241 | 652.9896696  | 0 |
| 9061   | PAPSS1    | 581.4469707 | 1041.807714  | 0 |
| 754    | PTTG1IP   | 582.1555399 | 2016.36066   | 0 |
| 220    | ALDH1A3   | 586.281563  | -306.5986944 | 0 |
| 506    | ATP5B     | 587.2689507 | 684.0164387  | 0 |
| 203068 | TUBB      | 587.8101431 | -67.733311   | 0 |
| 3067   | HDC       | 591.653372  | 196.3660918  | 0 |
| 12     | SERPINA3  | 594.0070341 | 489.5073689  | 0 |
| 6231   | RPS26     | 596.7083291 | -7970.234477 | 0 |
| 1306   | COL15A1   | 602.6419242 | -804.8826773 | 0 |
| 1303   | COL12A1   | 603.7260847 | -127.2149502 | 0 |
| 5901   | RAN       | 606.5576628 | -641.5266736 | 0 |
| 340542 | BEX5      | 608.1913019 | 482.2477954  | 0 |
| 5268   | SERPINB5  | 608.6081255 | -461.5729922 | 0 |
| 5688   | PSMA7     | 608.9073213 | -605.6383492 | 0 |
| 7805   | LAPTM5    | 609.105659  | 317.5209189  | 0 |
| 4105   | MAGEA6    | 612.5515374 | -372.0433189 | 0 |
| 5376   | PMP22     | 615.6648362 | -899.7382728 | 0 |
| 5217   | PFN2      | 618.4966946 | -655.341003  | 0 |
| 6282   | S100A11   | 619.8729795 | 1214.818917  | 0 |
| 400961 | PAIP2B    | 623.8571859 | 241.8152468  | 0 |
| 3032   | HADHB     | 624.2611539 | 524.2481584  | 0 |
| 22841  | RAB11FIP2 | 627.7307223 | 689.1976789  | 0 |
| 3769   | KCNJ13    | 629.2357802 | 65.57358268  | 0 |
| 9052   | GPRC5A    | 630.6377972 | -586.3658741 | 0 |
| 7388   | UQCRH     | 635.6053513 | 2329.100917  | 0 |

|        |           |             |              |   |
|--------|-----------|-------------|--------------|---|
| 2876   | GPX1      | 636.9383058 | 4220.881765  | 0 |
| 51330  | TNFRSF12A | 637.8529314 | 280.418898   | 0 |
| 27346  | TMEM97    | 640.3026346 | 1107.968837  | 0 |
| 7164   | TPD52L1   | 641.0563256 | 576.7148473  | 0 |
| 79602  | ADIPOR2   | 641.7049233 | 923.44766    | 0 |
| 7494   | XBP1      | 642.5404559 | 2930.416229  | 0 |
| 7381   | UQCRB     | 643.6983284 | -1508.321146 | 0 |
| 7504   | XK        | 645.6849884 | 111.0893718  | 0 |
| 7348   | UPK1B     | 651.9639687 | 121.2561484  | 0 |
| 3091   | HIF1A     | 654.1493096 | -537.1306774 | 0 |
| 645    | BLVRB     | 654.442454  | 2536.083697  | 0 |
| 2331   | FMOD      | 654.8919742 | 2952.822195  | 0 |
| 29785  | CYP2S1    | 657.7272588 | 313.5897669  | 0 |
| 3399   | ID3       | 659.0178667 | 1949.88697   | 0 |
| 3983   | ABLIM1    | 663.1007491 | 958.7692619  | 0 |
| 800    | CALD1     | 666.1359392 | -14695.84752 | 0 |
| 342979 | PALM3     | 668.5240999 | 468.9280921  | 0 |
| 51643  | TMBIM4    | 669.9112816 | 1892.539595  | 0 |
| 710    | SERPING1  | 670.014325  | -198.3287254 | 0 |
| 3815   | KIT       | 670.9898022 | 244.3712323  | 0 |
| 9445   | ITM2B     | 671.9030053 | 7564.105893  | 0 |
| 9370   | ADIPOQ    | 672.2337814 | 36.72015699  | 0 |
| 4128   | MAOA      | 672.4373825 | -422.468635  | 0 |
| 1525   | CXADR     | 674.7717385 | 473.2061117  | 0 |
| 549    | AUH       | 675.7516807 | 826.7202928  | 0 |
| 3217   | HOXB7     | 676.9595264 | -203.1237458 | 0 |
| 4638   | MYLK      | 680.7558556 | -15760.70455 | 0 |
| 5919   | RARRES2   | 682.9104216 | 324.0049998  | 0 |
| 4653   | MYOC      | 684.6205536 | -749.9960257 | 0 |
| 5757   | PTMA      | 685.3384064 | 4579.435252  | 0 |
| 3418   | IDH2      | 685.6594214 | 598.4709836  | 0 |
| 3303   | HSPA1A    | 690.4867029 | 36637.79629  | 0 |
| 9636   | ISG15     | 690.8301244 | -373.3227409 | 0 |
| 1066   | CES1      | 698.5376331 | 1975.526842  | 0 |
| 5034   | P4HB      | 700.0102251 | 1922.430324  | 0 |
| 80781  | COL18A1   | 705.0355501 | 5393.004338  | 0 |
| 1832   | DSP       | 708.0471351 | 2208.919361  | 0 |
| 6156   | RPL30     | 708.110651  | 20599.84919  | 0 |
| 579    | NKX3-2    | 708.2081549 | -48.73020456 | 0 |
| 9317   | PTER      | 708.5374568 | 299.1283413  | 0 |
| 270    | AMPD1     | 710.9246953 | 179.3567458  | 0 |
| 4697   | NDUFA4    | 715.221186  | -6682.527866 | 0 |
| 183    | AGT       | 715.6079904 | 11571.93035  | 0 |
| 79888  | LPCAT1    | 716.2354338 | -383.7722813 | 0 |

|        |          |             |              |   |
|--------|----------|-------------|--------------|---|
| 5420   | PODXL    | 718.6965932 | 1122.882571  | 0 |
| 27230  | SERP1    | 718.7045299 | 893.7424997  | 0 |
| 60     | ACTB     | 718.9840087 | 8383.282722  | 0 |
| 5396   | PRRX1    | 721.5056773 | -80.5966093  | 0 |
| 196    | AHR      | 722.1541094 | -391.876504  | 0 |
| 7033   | TFF3     | 723.1583837 | -61.7182915  | 0 |
| 10954  | PDIA5    | 723.3078308 | 760.9666799  | 0 |
| 2981   | GUCA2B   | 725.0823281 | 100.3322312  | 0 |
| 113146 | AHNAK2   | 725.090497  | -285.3496309 | 0 |
| 51660  | BRP44L   | 731.4400681 | 1682.382204  | 0 |
| 151887 | CCDC80   | 734.48086   | -365.2355183 | 0 |
| 28958  | CCDC56   | 735.9302726 | 831.8097221  | 0 |
| 84417  | C2orf40  | 739.2546522 | -16230.90205 | 0 |
| 10140  | TOB1     | 745.3733888 | 726.2039227  | 0 |
| 57533  | TBC1D14  | 746.1295362 | 843.5378404  | 0 |
| 80335  | WDR82    | 747.62766   | -397.2463258 | 0 |
| 7123   | CLEC3B   | 749.1277736 | 1432.46678   | 0 |
| 306    | ANXA3    | 749.5681369 | 875.9972885  | 0 |
| 7385   | UQCRC2   | 753.5001627 | 64.30724317  | 0 |
| 3912   | LAMB1    | 753.8856115 | 2639.143845  | 0 |
| 50     | AC02     | 754.7110616 | 263.2972731  | 0 |
| 1831   | TSC22D3  | 756.5697257 | 3674.012712  | 0 |
| 10103  | TSPAN1   | 760.0683748 | 289.6830453  | 0 |
| 55353  | LAPTM4B  | 764.1323996 | -1883.534523 | 0 |
| 10598  | AHSA1    | 764.9579485 | -456.4691103 | 0 |
| 54959  | ODAM     | 765.3011315 | 266.8480643  | 0 |
| 60559  | SPCS3    | 765.8499723 | 717.4793684  | 0 |
| 8673   | VAMP8    | 771.0238651 | 3247.96076   | 0 |
| 2512   | FTL      | 771.6559754 | 5767.883677  | 0 |
| 471    | ATIC     | 782.6552144 | -346.0874615 | 0 |
| 2950   | GSTP1    | 784.0696936 | 2859.571765  | 0 |
| 2181   | ACSL3    | 784.4897593 | 524.085617   | 0 |
| 8483   | CILP     | 785.4091152 | -667.3496366 | 0 |
| 522    | ATP5J    | 786.1984783 | -807.8196593 | 0 |
| 8991   | SELENBP1 | 786.3676675 | -3178.41571  | 0 |
| 1846   | DUSP4    | 786.8086817 | 514.6000544  | 0 |
| 5160   | PDHA1    | 787.2730037 | 485.8972437  | 0 |
| 57181  | SLC39A10 | 789.0220875 | -193.9717559 | 0 |
| 388677 | NOTCH2NL | 791.6780793 | 296.0874966  | 0 |
| 7153   | TOP2A    | 794.7885664 | -215.8277749 | 0 |
| 51495  | PTPLAD1  | 794.9491082 | 1198.281458  | 0 |
| 2821   | GPI      | 796.995414  | 141.8361205  | 0 |
| 10962  | MLLT11   | 797.3539708 | -568.2628206 | 0 |
| 6194   | RPS6     | 797.4240666 | 26457.36397  | 0 |

|        |           |             |              |   |
|--------|-----------|-------------|--------------|---|
| 4717   | NDUFC1    | 801.8536435 | 500.9654324  | 0 |
| 11335  | CBX3      | 803.1130226 | -84.22012761 | 0 |
| 3158   | HMGCS2    | 804.9258631 | 73.22661622  | 0 |
| 9111   | NMI       | 808.7980683 | -154.5735232 | 0 |
| 1373   | CPS1      | 809.5757293 | 1982.857231  | 0 |
| 139341 | FUNDC1    | 809.6734824 | 423.6750965  | 0 |
| 54504  | CPVL      | 810.2027476 | -132.3276037 | 0 |
| 55256  | ADI1      | 811.7199157 | 1152.177064  | 0 |
| 114926 | C8orf40   | 812.7007285 | 841.5867479  | 0 |
| 89894  | TMEM116   | 812.8832159 | 359.3547087  | 0 |
| 8667   | EIF3H     | 813.8702159 | 4755.702335  | 0 |
| 6124   | RPL4      | 814.5193017 | 5413.519596  | 0 |
| 51776  | ZAK       | 814.9611668 | -3558.477431 | 0 |
| 6203   | RPS9      | 815.6730036 | 6700.861855  | 0 |
| 5908   | RAP1B     | 815.9283776 | 929.0061118  | 0 |
| 5328   | PLAU      | 816.8595205 | -37.7756464  | 0 |
| 3326   | HSP90AB1  | 819.3698179 | 72.35440659  | 0 |
| 23603  | CORO1C    | 819.9751529 | -185.8423494 | 0 |
| 6161   | RPL32     | 822.7121922 | 27383.29953  | 0 |
| 153572 | IRX2      | 823.856991  | 125.6200773  | 0 |
| 154    | ADRB2     | 824.0368165 | 157.2646443  | 0 |
| 3553   | IL1B      | 824.1573756 | 570.6283205  | 0 |
| 27250  | PDCD4     | 824.710916  | 926.0180729  | 0 |
| 2706   | GJB2      | 825.899742  | -393.5240862 | 0 |
| 3339   | HSPG2     | 826.6930691 | 138.9586681  | 0 |
| 54460  | MRPS21    | 829.2118015 | 159.0814561  | 0 |
| 5067   | CNTN3     | 831.0881495 | 108.2640618  | 0 |
| 5476   | CTSA      | 831.2855531 | 152.6932146  | 0 |
| 2122   | MECOM     | 831.6856489 | 249.4948779  | 0 |
| 8815   | BANF1     | 831.8858757 | -96.95174472 | 0 |
| 83879  | CDCA7     | 833.5654777 | -259.6740196 | 0 |
| 7169   | TPM2      | 834.4946941 | -46339.1223  | 0 |
| 415116 | PIM3      | 835.005248  | 2399.100759  | 0 |
| 3241   | HPCAL1    | 836.8035534 | 327.3920835  | 0 |
| 6208   | RPS14     | 837.297351  | 6076.320968  | 0 |
| 2330   | FM05      | 838.4924659 | 1123.762648  | 0 |
| 56889  | TM9SF3    | 839.4737934 | 709.6555716  | 0 |
| 2      | A2M       | 839.9324724 | 5565.153775  | 0 |
| 2162   | F13A1     | 840.8937736 | 589.8763352  | 0 |
| 6632   | SNRPD1    | 841.3775379 | -132.9100306 | 0 |
| 55273  | TMEM100   | 845.0089554 | 60.29406142  | 0 |
| 643201 | LOC643201 | 845.2087583 | 5.237510926  | 0 |
| 6204   | RPS10     | 847.1434438 | 6596.371833  | 0 |
| 144501 | KRT80     | 852.1574487 | -12.14646808 | 0 |

|          |          |             |              |             |
|----------|----------|-------------|--------------|-------------|
| 7534     | YWHAZ    | 852.3227622 | 416.6490041  | 0           |
| 9833     | MELK     | 852.4714765 | -182.6467002 | 0           |
| 5436     | POLR2G   | 852.5115172 | 904.8064173  | 0           |
| 284996   | RNF149   | 852.9155244 | 217.8622592  | 0           |
| 5997     | RGS2     | 853.2761543 | -15949.52541 | 0           |
| 54979    | HRASLS2  | 856.9788941 | 168.722598   | 0           |
| 7941     | PLA2G7   | 857.8722872 | -1.606095229 | 0           |
| 643911   | CRNDE    | 858.0622585 | 268.2811436  | 0           |
| 11337    | GABARAP  | 858.3920331 | 3796.052461  | 0           |
| 6634     | SNRPD3   | 858.7125514 | -301.4739233 | 0           |
| 1179     | CLCA1    | 860.2447011 | -106.8198438 | 0           |
| 91689    | C22orf32 | 860.9346186 | 405.1386011  | 0           |
| 1909     | EDNRA    | 861.032325  | -257.7409433 | 0           |
| 8407     | TAGLN2   | 861.718201  | 671.692979   | 0           |
| 4314     | MMP3     | 861.9369424 | -207.0515961 | 0           |
| 10528    | NOP56    | 862.0697805 | -172.3406602 | 0           |
| 58515    | SELK     | 862.2451915 | 1248.298037  | 0           |
| 9843     | HEPH     | 863.9771606 | -436.0263069 | 0           |
| 51635    | DHRS7    | 865.5554398 | 525.2662175  | 0           |
| 2810     | SFN      | 871.2091575 | -1113.002914 | 0           |
| 10134    | BCAP31   | 871.8231137 | 811.3779406  | 0           |
| 25937    | WWTR1    | 871.973107  | -241.7550731 | 0           |
| 4716     | NDUFB10  | 872.677807  | 588.6293924  | 0           |
| 84513    | PPAPDC1B | 872.8993833 | 487.3477586  | 0           |
| 1307     | COL16A1  | 873.1316656 | -650.035432  | 0           |
| 10809    | STARD10  | 874.5578522 | 477.1707912  | 0           |
| 50507    | NOX4     | 875.2750956 | -15.37278559 | 0           |
| 9550     | ATP6V1G1 | 875.627398  | 1764.738152  | 0           |
| 1123     | CHN1     | 876.2985419 | -168.4148069 | 0           |
| 26064    | RAI14    | 879.333047  | -256.8382445 | 0           |
| 10951    | CBX1     | 880.1091268 | -331.0893295 | 0           |
| 222008   | VSTM2A   | 880.1668249 | 30.56719728  | 0           |
| 26872    | STEAP1   | 880.4258383 | -227.3604291 | 0           |
| 6144     | RPL21    | 883.7331069 | 7502.27137   | 0.000265957 |
| 4282     | MIF      | 884.9973705 | 4378.764144  | 0           |
| 5349     | FXVD3    | 886.5810634 | 248.7334646  | 0.00026455  |
| 2203     | FBP1     | 887.8162324 | 2313.807941  | 0.000263158 |
| 91137    | SLC25A46 | 888.4087543 | 315.1263276  | 0.00026178  |
| 4601     | MXI1     | 888.5167678 | 347.2551588  | 0.000260417 |
| 9358     | ITGBL1   | 890.368068  | 190.1185921  | 0           |
| 9509     | ADAMTS2  | 892.6588843 | -127.5708017 | 0           |
| 405753   | DUOXA2   | 892.9358794 | 170.9664183  | 0.000259067 |
| 4318     | MMP9     | 897.9781189 | -24.12037964 | 0           |
| 1.01E+08 | OCLN     | 899.0743322 | 278.6140737  | 0.000257732 |



|        |           |             |              |             |
|--------|-----------|-------------|--------------|-------------|
| 4677   | NARS      | 899.889028  | 689.5699     | 0.00025641  |
| 153769 | SH3RF2    | 901.7847416 | 126.1230912  | 0.000255102 |
| 25984  | KRT23     | 902.6659214 | -3.135260703 | 0           |
| 8972   | MGAM      | 902.7992381 | 60.95854744  | 0.000253807 |
| 200879 | LIPH      | 903.8091023 | 127.5206791  | 0.000252525 |
| 5159   | PDGFRB    | 904.37333   | 2873.077485  | 0           |
| 999    | CDH1      | 904.8581995 | 2251.270191  | 0.000251256 |
| 8507   | ENC1      | 911.1255529 | -253.3300948 | 0           |
| 493869 | GPX8      | 911.4523038 | -118.5822343 | 0           |
| 51280  | GOLM1     | 913.3065122 | 381.6932698  | 0.00025     |
| 27087  | B3GAT1    | 913.5172378 | 182.5054232  | 0.000248756 |
| 54205  | CYCS      | 915.5728889 | 366.90232    | 0.000247525 |
| 80307  | FER1L4    | 915.819573  | 390.3711965  | 0.000246305 |
| 55286  | C4orf19   | 916.123124  | 333.9117224  | 0.000245098 |
| 285148 | IAH1      | 918.0487519 | -126.2676797 | 0           |
| 7852   | CXCR4     | 925.3387147 | 15191.23122  | 0           |
| 26022  | TMEM98    | 925.4839465 | 977.8828553  | 0.000243902 |
| 6158   | RPL28     | 925.585267  | 5100.184905  | 0           |
| 79782  | LRRC31    | 926.2572124 | 70.66341749  | 0.000242718 |
| 7168   | TPM1      | 926.5686498 | -6009.138998 | 0           |
| 90355  | C5orf30   | 926.9254814 | 162.8585915  | 0.000241546 |
| 8904   | CPNE1     | 927.3119535 | -173.6671389 | 0           |
| 9245   | GCNT3     | 928.0532346 | -445.3906057 | 0           |
| 38     | ACAT1     | 930.9652862 | 347.0240515  | 0.000240385 |
| 10057  | ABCC5     | 931.4455648 | 260.7170003  | 0.000478469 |
| 5621   | PRNP      | 933.4053663 | -1534.942876 | 0           |
| 312    | ANXA13    | 935.3099958 | 771.2474042  | 0           |
| 23231  | SEL1L3    | 940.3690541 | 2059.060648  | 0.000473934 |
| 284578 | LOC284578 | 943.7960446 | 29.29640411  | 0.000471698 |
| 2615   | LRRC32    | 944.2210787 | 692.7678251  | 0           |
| 50808  | AK3       | 944.4480208 | 575.9060694  | 0.000469484 |
| 2852   | GPFR      | 944.7226167 | 161.9801917  | 0.00046729  |
| 25994  | HIGD1A    | 945.7524334 | -26.01251971 | 0.000465116 |
| 10576  | CCT2      | 950.5482786 | 310.6953024  | 0           |
| 3105   | HLA-A     | 953.1340916 | 7240.670934  | 0.000462963 |
| 1434   | CSE1L     | 954.3320553 | -92.15507054 | 0           |
| 64094  | SMOC2     | 956.3710599 | -14711.66068 | 0           |
| 65987  | KCTD14    | 958.1667511 | 184.7130058  | 0.000460829 |
| 23022  | PALLD     | 958.611488  | -3773.207259 | 0           |
| 5909   | RAP1GAP   | 960.1073794 | 297.7139094  | 0.000458716 |
| 10808  | HSPH1     | 960.1770537 | 4184.804002  | 0           |
| 51372  | CCDC72    | 960.5473565 | -541.0636843 | 0           |
| 6137   | RPL13     | 961.2511661 | 18015.02133  | 0           |
| 5655   | KLK10     | 962.3687349 | -82.00602354 | 0           |

|        |           |             |              |             |
|--------|-----------|-------------|--------------|-------------|
| 28996  | HIPK2     | 962.8048368 | 247.6064331  | 0.000456621 |
| 85377  | MICALL1   | 962.9657385 | 271.269677   | 0.000454545 |
| 84102  | SLC41A2   | 963.1493263 | 202.2898995  | 0.000452489 |
| 253012 | HEPACAM2  | 963.6517028 | -120.7530148 | 0.00045045  |
| 144363 | LYRM5     | 963.9373961 | 293.454979   | 0.00044843  |
| 4547   | MTTP      | 964.2726388 | 261.8123234  | 0.000446429 |
| 112609 | MRAP2     | 964.457493  | 144.0842377  | 0.000444444 |
| 1075   | CTSC      | 964.9219665 | -324.4352982 | 0           |
| 2983   | GUCY1B3   | 965.33526   | -147.8674376 | 0           |
| 51454  | GULP1     | 969.8179251 | 188.3332707  | 0.000442478 |
| 25847  | ANAPC13   | 971.5666202 | 466.9880453  | 0.000440529 |
| 4953   | ODC1      | 972.8375701 | -1123.872231 | 0           |
| 728342 | LOC728342 | 974.2585146 | 14.06874566  | 0.000438596 |
| 3671   | ISLR      | 974.8094188 | 2614.139522  | 0           |
| 1734   | DI02      | 975.2248757 | -171.5539648 | 0           |
| 30008  | EFEMP2    | 975.6725147 | 167.1925238  | 0           |
| 3627   | CXCL10    | 977.2695949 | -397.9592289 | 0           |
| 5111   | PCNA      | 977.9500944 | -189.8682633 | 0           |
| 8664   | EIF3D     | 978.9345889 | 1517.938033  | 0.00026178  |
| 2877   | GPX2      | 979.3165357 | 641.2589994  | 0.000436681 |
| 7851   | MALL      | 980.5664757 | -150.2165949 | 0.000260417 |
| 25874  | BRP44     | 980.6851187 | 439.8174871  | 0.000434783 |
| 10040  | TOM1L1    | 981.3819375 | 419.6587537  | 0.0004329   |
| 5478   | PPIA      | 981.7759025 | 1256.138952  | 0.000515464 |
| 57758  | SCUBE2    | 982.4601655 | 122.8993599  | 0.000431034 |
| 5734   | PTGER4    | 982.8530591 | 640.6894934  | 0.000429185 |
| 7130   | TNFAIP6   | 985.0179063 | -74.77151022 | 0.000512821 |
| 5105   | PCK1      | 985.5434454 | 786.6965648  | 0.00042735  |
| 2919   | CXCL1     | 987.1922191 | 306.76434    | 0.000510204 |
| 55969  | C20orf24  | 988.5004365 | 115.1593084  | 0.000507614 |
| 5646   | PRSS3     | 989.1353262 | -330.2191905 | 0.000505051 |
| 26509  | MYOF      | 992.0621365 | -281.2519316 | 0.000502513 |
| 11341  | SCRG1     | 992.6565663 | -1692.340658 | 5.00E-04    |
| 51146  | A4GNT     | 995.8711692 | 157.2851394  | 0.000425532 |
| 4171   | MCM2      | 996.3910352 | -242.5953563 | 0.000497512 |
| 158038 | LING02    | 997.0140525 | 72.77706115  | 0.000423729 |
| 891    | CCNB1     | 1000.956784 | -124.2327375 | 0.00049505  |
| 51186  | WBP5      | 1000.976771 | 792.3185763  | 0.000421941 |
| 9349   | RPL23     | 1001.260759 | 18783.28963  | 0.000492611 |
| 3312   | HSPA8     | 1002.261288 | -456.6499884 | 0.000735294 |
| 4946   | OAZ1      | 1002.449097 | 10238.05352  | 0.000420168 |
| 5996   | RGS1      | 1003.212966 | 2884.154403  | 0.000731707 |
| 7165   | TPD52L2   | 1003.924736 | -363.4174072 | 0.000728155 |
| 7378   | UPP1      | 1005.522457 | -145.7132854 | 0.000724638 |

|        |           |             |              |             |
|--------|-----------|-------------|--------------|-------------|
| 9728   | SECISBP2L | 1005.533575 | 290.1091534  | 0.00041841  |
| 7529   | YWHAB     | 1005.917024 | 1134.193136  | 0.000721154 |
| 705    | BYSL      | 1010.188703 | -61.24008931 | 0.000717703 |
| 5825   | ABCD3     | 1010.332426 | 322.5596462  | 0.000416667 |
| 5660   | PSAP      | 1011.156613 | -168.2010152 | 0.000714286 |
| 10577  | NPC2      | 1011.523916 | 4868.179611  | 0.0007109   |
| 8399   | PLA2G10   | 1011.700186 | 80.53019186  | 0.000414938 |
| 7538   | ZFP36     | 1011.730605 | 7614.625401  | 0.000413223 |
| 3799   | KIF5B     | 1013.284414 | -394.977785  | 0.000707547 |
| 4071   | TM4SF1    | 1013.49218  | 3029.958356  | 0.000704225 |
| 822    | CAPG      | 1013.675682 | -145.3475641 | 0.000700935 |
| 10574  | CCT7      | 1014.448697 | 262.7049484  | 0.000697674 |
| 128218 | TMEM125   | 1015.049863 | 547.4891889  | 0.000411523 |
| 4969   | OGN       | 1017.542112 | -567.5185673 | 0.000694444 |
| 6635   | SNRPE     | 1020.325233 | 49.67190182  | 0.000691244 |
| 84958  | SYTL1     | 1022.097087 | 547.0077138  | 0.000409836 |
| 25837  | RAB26     | 1022.416113 | 218.2396705  | 0.000408163 |
| 404037 | HAPLN4    | 1022.815255 | 21.25177283  | 0.000406504 |
| 5627   | PROS1     | 1023.045642 | 715.5034444  | 0.000688073 |
| 644150 | WIPF3     | 1024.019754 | 128.0940348  | 0.000404858 |
| 55902  | ACSS2     | 1025.018355 | 268.4573027  | 0.000403226 |
| 1975   | EIF4B     | 1027.989015 | 1504.285637  | 0.000401606 |
| 55379  | LRRC59    | 1029.448312 | 550.3659029  | 4.00E-04    |
| 53339  | BTBD1     | 1029.454216 | 292.3815599  | 0.000684932 |
| 10979  | FERMT2    | 1030.311256 | -1338.210328 | 0.000681818 |
| 2110   | ETFDH     | 1030.536101 | 78.28616465  | 0.000398406 |
| 3915   | LAMC1     | 1031.801536 | -1737.47252  | 0.000678733 |
| 727    | C5        | 1031.942731 | 572.149948   | 0.000396825 |
| 3134   | HLA-F     | 1036.304795 | 4752.576489  | 0.000675676 |
| 29108  | PYCARD    | 1036.916476 | 999.4170375  | 0.000672646 |
| 5162   | PDHB      | 1038.122472 | 442.3995619  | 0.000592885 |
| 55512  | SMPD3     | 1040.988859 | 594.4679008  | 0.000590551 |
| 201895 | C4orf34   | 1043.973685 | 390.029845   | 0.000588235 |
| 9837   | GINS1     | 1045.897516 | -170.9751652 | 0.000892857 |
| 23582  | CCNDBP1   | 1047.108777 | 461.6081804  | 0.000585938 |
| 586    | BCAT1     | 1047.431682 | -37.23170683 | 0.000888889 |
| 114907 | FBX032    | 1048.625521 | -2941.982521 | 0.000884956 |
| 103910 | MYL12B    | 1050.056135 | 5974.211726  | 0.000881057 |
| 6168   | RPL37A    | 1050.789853 | 12308.91144  | 0.000583658 |
| 29089  | UBE2T     | 1053.830134 | -121.5373246 | 0.001096491 |
| 7298   | TYMS      | 1054.110369 | -169.5191769 | 0.001091703 |
| 85477  | SCIN      | 1054.96089  | 79.90404764  | 0.000775194 |
| 116535 | MRGPRF    | 1056.545044 | -331.0150961 | 0.001082251 |
| 6636   | SNRPF     | 1058.73553  | 176.6446909  | 0.001508621 |

|        |          |             |              |             |
|--------|----------|-------------|--------------|-------------|
| 54812  | AFTPH    | 1060.263595 | 594.6768345  | 0.000772201 |
| 255027 | MPV17L   | 1060.42506  | 202.2886053  | 0.000769231 |
| 117247 | SLC16A10 | 1064.441174 | 152.4887021  | 0.000766284 |
| 5446   | PON3     | 1064.921305 | 3283.16556   | 0.000763359 |
| 291    | SLC25A4  | 1065.070788 | -100.0502341 | 0.000760456 |
| 2139   | EYA2     | 1065.218551 | 72.50985612  | 0.000757576 |
| 2354   | FOSB     | 1065.442169 | 1798.928564  | 0.000754717 |
| 8490   | RGS5     | 1066.11922  | -2833.52961  | 0.00075188  |
| 23601  | CLEC5A   | 1066.280597 | 14.66028349  | 0.001495726 |
| 1350   | COX7C    | 1066.647959 | -2375.29597  | 0.000749064 |
| 6129   | RPL7     | 1067.561319 | 2456.851065  | 0.000746269 |
| 10874  | NMU      | 1067.691756 | -30.72461391 | 0.001489362 |
| 5692   | PSMB4    | 1068.593326 | 2348.265045  | 0.001483051 |
| 339    | APOBEC1  | 1070.258638 | 60.04415783  | 0.000743494 |
| 2048   | EPHB2    | 1070.67276  | -44.26502344 | 0.001476793 |
| 57153  | SLC44A2  | 1071.656977 | 342.9598054  | 0.000740741 |
| 1942   | EFNA1    | 1073.829343 | 6.412630489  | 0.001680672 |
| 1033   | CDKN3    | 1075.829288 | -175.8654463 | 0.00167364  |
| 8864   | PER2     | 1076.023608 | 140.3696184  | 0.000738007 |
| 8884   | SLC5A6   | 1077.98522  | -61.75535846 | 0.001666667 |
| 27098  | CLUL1    | 1078.805896 | 31.60394122  | 0.000919118 |
| 56994  | CHPT1    | 1078.982964 | 228.2550965  | 0.000915751 |
| 7832   | BTG2     | 1080.75345  | -17003.9507  | 0.000909091 |
| 29127  | RACGAP1  | 1083.618968 | -342.0929556 | 0.002074689 |
| 2207   | FCER1G   | 1085.515619 | 1421.349621  | 0.002066116 |
| 6119   | RPA3     | 1085.93198  | -4.296955044 | 0.002057613 |
| 83661  | MS4A8B   | 1086.942336 | 42.57332789  | 0.000905797 |
| 2171   | FABP5    | 1087.400242 | 608.147539   | 0.000902527 |
| 140628 | GATA5    | 1088.613363 | 149.6731233  | 0.000899281 |
| 27249  | MMADHC   | 1088.773843 | 474.8676633  | 0.000896057 |
| 521    | ATP5I    | 1089.144921 | 159.2231024  | 0.000892857 |
| 5408   | PNLIPRP2 | 1089.428553 | 46.80250942  | 0.00088968  |
| 2517   | FUCA1    | 1093.019198 | 544.5978832  | 0.000886525 |
| 23530  | NNT      | 1096.087238 | 213.9246835  | 0.000883392 |
| 412    | STS      | 1096.11167  | 78.48737482  | 0.000880282 |
| 7837   | PXDN     | 1096.527357 | 773.1184661  | 0.002254098 |
| 6234   | RPS28    | 1097.57893  | 43928.48752  | 0.000877193 |
| 51303  | FKBP11   | 1097.598837 | 1280.345469  | 0.000874126 |
| 23327  | NEDD4L   | 1098.520606 | 158.777102   | 0.00087108  |
| 81611  | ANP32E   | 1099.529778 | -125.3198927 | 0.002244898 |
| 27324  | TOX3     | 1100.107686 | 75.74905065  | 0.000868056 |
| 2571   | GAD1     | 1102.128773 | -41.95338401 | 0.002235772 |
| 1936   | EEF1D    | 1102.205101 | 2777.416664  | 0.002226721 |
| 124944 | C17orf49 | 1103.154564 | 523.5658152  | 0.002217742 |

|        |           |             |              |             |
|--------|-----------|-------------|--------------|-------------|
| 91894  | C11orf52  | 1106.340421 | 276.7404569  | 0.000865052 |
| 81     | ACTN4     | 1108.34013  | -76.24617491 | 0.002208835 |
| 7037   | TFRC      | 1108.840043 | -440.833656  | 0.0022      |
| 1736   | DKC1      | 1109.904883 | 3.027930985  | 0.002390438 |
| 8763   | CD164     | 1111.949854 | 394.5301655  | 0.001030928 |
| 22908  | SACM1L    | 1112.346142 | 379.1540424  | 0.001027397 |
| 11226  | GALNT6    | 1112.581914 | 166.360383   | 0.001023891 |
| 4111   | MAGEA12   | 1112.873885 | -127.1481141 | 0.002579365 |
| 2617   | GARS      | 1113.750961 | -309.6694519 | 0.00256917  |
| 51501  | C11orf73  | 1116.055913 | -394.0860933 | 0.002755906 |
| 4982   | TNFRSF11B | 1116.43199  | 112.8048668  | 0.002745098 |
| 8671   | SLC4A4    | 1117.356903 | 1566.75424   | 0.001190476 |
| 1557   | CYP2C19   | 1117.519557 | 410.8039242  | 0.001186441 |
| 90865  | IL33      | 1118.649428 | 839.2971794  | 0.001182432 |
| 10365  | KLF2      | 1118.883537 | 5429.64639   | 0.001178451 |
| 151230 | KLHL23    | 1119.605724 | -218.433172  | 0.002734375 |
| 10972  | TMED10    | 1120.383864 | 1545.44806   | 0.001174497 |
| 1829   | DSG2      | 1120.42761  | 260.4947199  | 0.001170569 |
| 57509  | MTUS1     | 1120.57365  | 192.5200876  | 0.001166667 |
| 1973   | EIF4A1    | 1121.405935 | 1003.164889  | 0.002723735 |
| 1545   | CYP1B1    | 1123.377734 | -523.083731  | 0.002713178 |
| 397    | ARHGDIB   | 1124.761244 | 7901.639046  | 0.002895753 |
| 1351   | COX8A     | 1126.052644 | 1110.031618  | 0.001162791 |
| 2562   | GABRB3    | 1126.294438 | 80.30049225  | 0.00115894  |
| 8284   | KDM5D     | 1126.33885  | 237.4101796  | 0.001155116 |
| 23090  | ZNF423    | 1126.403642 | -99.78657788 | 0.002884615 |
| 6506   | SLC1A2    | 1127.065317 | 207.4166454  | 0.001151316 |
| 729    | C6        | 1128.075185 | 689.8210319  | 0.001147541 |
| 10399  | GNB2L1    | 1128.410217 | 3237.825753  | 0.001143791 |
| 886    | CKAR      | 1128.667657 | 103.757072   | 0.001140065 |
| 24137  | KIF4A     | 1128.957478 | -108.8134825 | 0.002873563 |
| 57168  | ASPHD2    | 1129.300925 | 104.141151   | 0.001136364 |
| 79717  | PPCS      | 1130.788302 | 339.5031977  | 0.001132686 |
| 4711   | NDUFB5    | 1131.255141 | 666.3265333  | 0.001129032 |
| 55829  | SELS      | 1131.606753 | 313.7354821  | 0.001125402 |
| 1019   | CDK4      | 1132.070147 | 651.4805289  | 0.002862595 |
| 79041  | TMEM38A   | 1133.534454 | 73.82573898  | 0.001121795 |
| 3015   | H2AFZ     | 1135.567831 | -619.6357971 | 0.003422053 |
| 51596  | CUTA      | 1135.907073 | 4460.230246  | 0.001118211 |
| 3728   | JUP       | 1137.092013 | 624.900104   | 0.003598485 |
| 80139  | ZNF703    | 1140.517924 | -154.2978904 | 0.003584906 |
| 79949  | C10orf81  | 1142.130042 | -33.73720909 | 0.003759398 |
| 5805   | PTS       | 1144.060762 | 483.106419   | 0.00111465  |
| 647979 | LOC647979 | 1145.137636 | -394.8841727 | 0.003745318 |

|        |          |             |              |             |
|--------|----------|-------------|--------------|-------------|
| 55165  | CEP55    | 1145.187756 | -127.1474852 | 0.003731343 |
| 55600  | ITLN1    | 1146.294395 | 2.087328559  | 0.001111111 |
| 3400   | ID4      | 1146.405779 | 1344.604311  | 0.001107595 |
| 28959  | TMEM176B | 1147.491246 | 430.8457269  | 0.003717472 |
| 10552  | ARPC1A   | 1148.573201 | 478.52682    | 0.001104101 |
| 11153  | FICD     | 1150.029087 | 167.1377852  | 0.001100629 |
| 10924  | SMPDL3A  | 1150.15562  | 401.5605993  | 0.001097179 |
| 9891   | NUAK1    | 1153.184069 | 153.774958   | 0.003888889 |
| 1E+08  | HOTAIR   | 1154.976717 | 4.625621833  | 0.003874539 |
| 10904  | BLCAP    | 1156.140191 | -420.8488265 | 0.003860294 |
| 9104   | RGN      | 1156.144283 | 490.9997823  | 0.00140625  |
| 2888   | GRB14    | 1156.16173  | 1043.557275  | 0.003846154 |
| 2641   | GCG      | 1156.619604 | 36.53766334  | 0.001401869 |
| 9258   | MFHAS1   | 1156.834982 | -147.0888708 | 0.003832117 |
| 27243  | CHMP2A   | 1157.7072   | 793.5260746  | 0.001397516 |
| 64283  | RGNEF    | 1157.786601 | 118.5948135  | 0.001393189 |
| 10615  | SPAG5    | 1158.597695 | -74.38293149 | 0.003818182 |
| 84674  | CARD6    | 1159.48963  | 557.6391357  | 0.00154321  |
| 5125   | PCSK5    | 1163.391055 | 0.235331217  | 0.003985507 |
| 847    | CAT      | 1163.952282 | 680.8778416  | 0.001846154 |
| 3281   | HSBP1    | 1164.867183 | -246.2314244 | 0.004151625 |
| 51704  | GPRC5B   | 1165.973199 | 1016.109083  | 0.001840491 |
| 9451   | EIF2AK3  | 1166.877858 | 274.3418181  | 0.001834862 |
| 23531  | MMD      | 1167.20732  | 99.55929854  | 0.004136691 |
| 3611   | ILK      | 1167.472625 | -207.2844141 | 0.004121864 |
| 7644   | ZNF91    | 1167.893748 | 252.3547443  | 0.001829268 |
| 8836   | GGH      | 1169.159571 | 257.8966424  | 0.004464286 |
| 6920   | TCEA3    | 1171.2061   | 301.1821235  | 0.001823708 |
| 857    | CAV1     | 1171.454259 | -2655.891264 | 0.004626335 |
| 4714   | NDUFB8   | 1172.059662 | -505.8454344 | 0.001818182 |
| 9791   | PTDSS1   | 1172.915401 | 322.1217333  | 0.004609929 |
| 26278  | SACS     | 1173.931501 | -520.5348132 | 0.004770318 |
| 124    | ADH1A    | 1175.224488 | 1312.042962  | 0.001963746 |
| 10590  | SCGN     | 1175.700721 | 777.1684986  | 0.001957831 |
| 57326  | PBXIP1   | 1176.78323  | 297.4460148  | 0.001951952 |
| 26528  | DAZAP1   | 1176.839039 | -92.06641082 | 0.004753521 |
| 56898  | BDH2     | 1177.686175 | 178.9746493  | 0.001946108 |
| 5157   | PDGFRL   | 1178.601353 | -81.67025912 | 0.004736842 |
| 54981  | C9orf95  | 1178.912119 | 558.888308   | 0.002089552 |
| 5267   | SERPINA4 | 1178.958978 | 442.0353008  | 0.002083333 |
| 84191  | FAM96A   | 1180.625645 | 774.7727374  | 0.002077151 |
| 10476  | ATP5H    | 1181.83147  | -160.6098332 | 0.002071006 |
| 157869 | C8orf84  | 1182.225552 | -1447.594945 | 0.002064897 |
| 1611   | DAP      | 1183.090029 | 442.2071512  | 0.002205882 |

|        |          |             |              |             |
|--------|----------|-------------|--------------|-------------|
| 7078   | TIMP3    | 1183.161366 | 4501.018769  | 0.004895105 |
| 145788 | FLJ27352 | 1184.258754 | 175.9141536  | 0.002199413 |
| 5708   | PSMD2    | 1185.140573 | 48.58203681  | 0.004878049 |
| 8364   | HIST1H4C | 1185.348433 | 3312.95395   | 0.005034722 |
| 1657   | DMXL1    | 1186.25969  | 293.5685858  | 0.002192982 |
| 1503   | CTPS     | 1186.324974 | -140.3762627 | 0.005190311 |
| 2192   | FBLN1    | 1186.721351 | -827.1262582 | 0.005344828 |
| 260425 | MAGI3    | 1186.855023 | 157.37178    | 0.002186589 |
| 3486   | IGFBP3   | 1187.709891 | 3112.287236  | 0.00532646  |
| 23366  | KIAA0895 | 1188.022288 | 151.1814725  | 0.002325581 |
| 27295  | PDLIM3   | 1189.926849 | -9047.307133 | 0.005479452 |
| 3460   | IFNGR2   | 1190.286716 | 49.63286472  | 0.005460751 |
| 9211   | LGI1     | 1190.608018 | 0.703097709  | 0.002463768 |
| 30011  | SH3KBP1  | 1191.356999 | -287.5175679 | 0.005442177 |
| 1191   | CLU      | 1191.797602 | 1476.252636  | 0.002456647 |
| 399665 | FAM102A  | 1193.612284 | 1581.545518  | 0.00259366  |
| 3920   | LAMP2    | 1194.870485 | 904.3085914  | 0.002729885 |
| 3171   | FOXA3    | 1196.573526 | 166.9914544  | 0.002722063 |
| 1959   | EGR2     | 1197.379811 | 1291.262383  | 0.00559322  |
| 6347   | CCL2     | 1198.330882 | 3984.690726  | 0.005574324 |
| 10473  | HMGN4    | 1198.782068 | -108.9112557 | 0.005555556 |
| 3301   | DNAJA1   | 1199.524791 | 191.7957722  | 0.005536913 |
| 48     | AC01     | 1200.56347  | 38.12411146  | 0.002714286 |
| 10921  | RNPS1    | 1201.551795 | 111.785189   | 0.005685619 |
| 81606  | LBH      | 1203.111144 | 476.8202176  | 0.005833333 |
| 788    | SLC25A20 | 1203.310941 | 215.220865   | 0.002706553 |
| 55872  | PBK      | 1204.685942 | -178.5003756 | 0.005980066 |
| 55789  | DEPDC1B  | 1204.830876 | -32.3844567  | 0.005960265 |
| 9890   | LPPR4    | 1205.65807  | -38.1396238  | 0.006105611 |
| 22919  | MAPRE1   | 1208.026219 | -794.4576349 | 0.006085526 |
| 4594   | MUT      | 1208.208131 | 456.8167152  | 0.002982955 |
| 55500  | ETNK1    | 1208.369436 | 252.9062279  | 0.002974504 |
| 4726   | NDUFS6   | 1208.858947 | -342.7793958 | 0.006229508 |
| 55651  | NHP2     | 1209.60625  | 878.5210964  | 0.00620915  |
| 6209   | RPS15    | 1210.12778  | 20289.377    | 0.002966102 |
| 1043   | CD52     | 1210.64362  | 1865.24649   | 0.006188925 |
| 284119 | PTRF     | 1210.698636 | 15548.5606   | 0.006168831 |
| 84894  | LING01   | 1211.778805 | -6.600672874 | 0.006148867 |
| 133121 | ENPP6    | 1214.499143 | 28.33609405  | 0.003239437 |
| 63924  | CIDEC    | 1214.69867  | 59.19582448  | 0.003230337 |
| 55365  | TMEM176A | 1215.939389 | 2340.061146  | 0.006129032 |
| 3021   | H3F3B    | 1216.38368  | 912.2128678  | 0.006109325 |
| 388610 | TRNP1    | 1218.440203 | 284.8085927  | 0.003361345 |
| 10158  | PDZK1IP1 | 1218.524032 | 370.2625124  | 0.00349162  |

|        |           |             |              |             |
|--------|-----------|-------------|--------------|-------------|
| 5264   | PHYH      | 1218.685605 | 221.8440065  | 0.003481894 |
| 57801  | HES4      | 1218.99723  | 1852.020753  | 0.006089744 |
| 64284  | RAB17     | 1219.346392 | 695.3439619  | 0.003472222 |
| 55076  | TMEM45A   | 1219.995271 | 169.0034439  | 0.006230032 |
| 7095   | SEC62     | 1220.838104 | 294.1468281  | 0.003601108 |
| 55351  | STK32B    | 1221.636739 | 55.067135    | 0.00359116  |
| 8835   | SOCS2     | 1221.726157 | -229.5373079 | 0.003581267 |
| 514    | ATP5E     | 1222.643654 | 1203.915778  | 0.006528662 |
| 254428 | SLC41A1   | 1223.88458  | 276.3461131  | 0.003846154 |
| 6354   | CCL7      | 1224.791857 | -11.87354708 | 0.006825397 |
| 5054   | SERPINE1  | 1224.81769  | -48.22737759 | 0.006803797 |
| 5872   | RAB13     | 1227.79826  | -313.0255865 | 0.006782334 |
| 7035   | TFPI      | 1228.626276 | 509.3993532  | 0.006761006 |
| 10226  | PLIN3     | 1231.365336 | -140.9892003 | 0.006896552 |
| 64288  | ZNF323    | 1234.389455 | 117.274995   | 0.004109589 |
| 6418   | SET       | 1235.351887 | 404.5286402  | 0.00703125  |
| 10351  | ABCA8     | 1235.379738 | 132.1175786  | 0.004098361 |
| 10673  | TNFSF13B  | 1236.872625 | -112.1520195 | 0.007165109 |
| 7171   | TPM4      | 1238.256293 | -342.393885  | 0.007142857 |
| 202181 | LOC202181 | 1238.39278  | 100.8285026  | 0.004211957 |
| 219931 | TPCN2     | 1239.038928 | 175.3729248  | 0.004200542 |
| 293    | SLC25A6   | 1239.65258  | 3677.013694  | 0.004189189 |
| 9926   | LPGAT1    | 1239.720531 | -70.79404278 | 0.007120743 |
| 11040  | PIM2      | 1240.098776 | 257.148786   | 0.004177898 |
| 4286   | MITF      | 1242.202153 | 279.3188086  | 0.004435484 |
| 4217   | MAP3K5    | 1242.357682 | 427.9184401  | 0.004423592 |
| 10493  | VAT1      | 1244.014258 | 625.8081819  | 0.007253086 |
| 23258  | DENND5A   | 1245.040232 | 45.30130393  | 0.007230769 |
| 951    | CD37      | 1245.55103  | 136.5571649  | 0.007208589 |
| 9805   | SCRN1     | 1246.579741 | -565.6517361 | 0.007186544 |
| 23452  | ANGPTL2   | 1246.659375 | 218.8572267  | 0.007164634 |
| 7057   | THBS1     | 1246.750387 | 141.3480845  | 0.007142857 |
| 1044   | CDX1      | 1248.66313  | -93.46868526 | 0.007575758 |
| 5052   | PRDX1     | 1252.928654 | 692.2361969  | 0.00755287  |
| 307    | ANXA4     | 1253.103157 | 15899.46697  | 0.00753012  |
| 58191  | CXCL16    | 1255.316994 | -31.40420237 | 0.007507508 |
| 65108  | MARCKSL1  | 1255.467192 | 367.9052989  | 0.00748503  |
| 51079  | NDUFA13   | 1255.91418  | 253.5151959  | 0.007462687 |
| 158158 | RASEF     | 1256.200787 | 230.0416938  | 0.004545455 |
| 94274  | PPP1R14A  | 1256.256902 | -780.9059101 | 0.007440476 |
| 1848   | DUSP6     | 1258.067157 | 1037.274459  | 0.007418398 |
| 55612  | FERMT1    | 1258.885829 | -99.13414886 | 0.00739645  |
| 9790   | BMS1      | 1259.954702 | -128.0773106 | 0.007374631 |
| 643155 | C5orf43   | 1262.304185 | 337.9064859  | 0.004920213 |



|        |            |             |              |             |
|--------|------------|-------------|--------------|-------------|
| 8710   | SERPINB7   | 1262.506356 | 21.2992114   | 0.004907162 |
| 10487  | CAP1       | 1262.531077 | -284.1049108 | 0.0075      |
| 6134   | RPL10      | 1262.978777 | 18268.88944  | 0.00489418  |
| 939    | CD27       | 1263.527557 | 532.877645   | 0.005013193 |
| 430    | ASCL2      | 1265.751865 | 28.98724343  | 0.007624633 |
| 55454  | CSGALNACT2 | 1265.881522 | -86.81650292 | 0.007602339 |
| 5191   | PEX7       | 1266.654237 | 211.0411434  | 0.005263158 |
| 51015  | ISOC1      | 1267.161585 | -104.3033974 | 0.005380577 |
| 440    | ASNS       | 1267.258519 | 258.1895002  | 0.005366492 |
| 55355  | HJURP      | 1268.186861 | -110.1789425 | 0.007580175 |
| 6197   | RPS6KA3    | 1268.369955 | 291.1808229  | 0.00755814  |
| 150696 | PROM2      | 1268.485094 | 75.15420876  | 0.00535248  |
| 6218   | RPS17      | 1269.214659 | 21712.03512  | 0.005338542 |
| 2633   | GBP1       | 1269.441507 | -388.0603175 | 0.007803468 |
| 2646   | GCKR       | 1269.692382 | 99.87622122  | 0.005324675 |
| 54869  | EPS8L1     | 1270.449925 | 498.2271301  | 0.005310881 |
| 5694   | PSMB6      | 1271.641874 | 24.86386162  | 0.008213256 |
| 158    | ADSL       | 1271.653472 | -231.2738718 | 0.008189655 |
| 129607 | CMPK2      | 1271.926075 | 237.9144295  | 0.005555556 |
| 134147 | CMBL       | 1273.813804 | 194.7641536  | 0.005541237 |
| 5357   | PLS1       | 1273.997174 | 407.0819583  | 0.005526992 |
| 2992   | GYG1       | 1274.941663 | -770.8481681 | 0.008309456 |
| 26     | ABP1       | 1275.997707 | -203.9728801 | 0.008285714 |
| 9928   | KIF14      | 1276.491758 | -67.3147582  | 0.008262108 |
| 9569   | GTF2IRD1   | 1277.312489 | -378.4937637 | 0.008238636 |
| 7368   | UGT8       | 1277.883341 | 145.9245961  | 0.005769231 |
| 10242  | KCNMB2     | 1279.871317 | 38.35317201  | 0.00601023  |
| 23321  | TRIM2      | 1282.416828 | 245.9076204  | 0.005994898 |
| 2524   | FUT2       | 1282.785222 | 157.9500327  | 0.005979644 |
| 57688  | ZSWIM6     | 1284.002953 | 107.238612   | 0.005964467 |
| 11014  | KDELR2     | 1284.473311 | 961.3202752  | 0.005949367 |
| 5652   | PRSS8      | 1285.308407 | 1873.29144   | 0.005934343 |
| 81037  | CLPTM1L    | 1285.359524 | 397.8606672  | 0.005919395 |
| 3098   | HK1        | 1285.515263 | 176.5762162  | 0.005904523 |
| 2180   | ACSL1      | 1285.622241 | 355.1618338  | 0.005889724 |
| 5702   | PSMC3      | 1286.047636 | -166.5817242 | 0.008923513 |
| 1114   | CHGB       | 1287.191532 | 85.89430661  | 0.005875    |
| 83468  | GLT8D2     | 1290.091213 | -23.05953388 | 0.009322034 |
| 148418 | SAMD13     | 1290.891755 | 133.9278649  | 0.005985037 |
| 84886  | Clorf198   | 1290.956698 | 1206.047856  | 0.009295775 |
| 22948  | CCT5       | 1291.155298 | -223.7099624 | 0.009269663 |
| 3620   | IDO1       | 1291.368375 | -173.7573412 | 0.009383754 |
| 129293 | C2orf89    | 1293.601882 | 71.38938914  | 0.009497207 |
| 4241   | MFI2       | 1294.597647 | -41.81114697 | 0.009610028 |

|        |           |             |              |             |
|--------|-----------|-------------|--------------|-------------|
| 4627   | MYH9      | 1294.81731  | 3749.185255  | 0.009583333 |
| 9551   | ATP5J2    | 1294.925367 | 689.7110849  | 0.006218905 |
| 3921   | RPSA      | 1296.174603 | 4654.028035  | 0.006203474 |
| 401081 | FLJ22763  | 1297.961309 | 35.30834399  | 0.006435644 |
| 8174   | MADCAM1   | 1298.432972 | 133.2953188  | 0.006419753 |
| 51144  | HSD17B12  | 1299.197783 | 496.9597506  | 0.006527094 |
| 23462  | HEY1      | 1299.802894 | -0.024127312 | 0.009972299 |
| 133    | ADM       | 1299.994198 | 367.7186661  | 0.006633907 |
| 23303  | KIF13B    | 1300.072537 | 763.7421198  | 0.006617647 |
| 1072   | CFL1      | 1300.907557 | -11.31985212 | 0.009944751 |
| 3108   | HLA-DMA   | 1301.024399 | 1726.474223  | 0.006723716 |
| 375484 | C5orf25   | 1301.454613 | 110.0502037  | 0.006707317 |
| 10159  | ATP6AP2   | 1301.895315 | -125.8277676 | 0.010055096 |
| 1629   | DBT       | 1304.317513 | 230.547181   | 0.006934307 |
| 11332  | ACOT7     | 1304.949539 | -88.29722017 | 0.010714286 |
| 80004  | ESRP2     | 1305.603123 | 296.4279986  | 0.006917476 |
| 10082  | GPC6      | 1305.802499 | -4.393889251 | 0.010684932 |
| 5352   | PLOD2     | 1306.533385 | -211.4205508 | 0.010928962 |
| 6993   | DYNLT1    | 1307.875873 | 810.0091784  | 0.011035422 |
| 687    | KLF9      | 1307.931401 | 599.4062015  | 0.006900726 |
| 23336  | SYNM      | 1308.200312 | -11782.97036 | 0.011005435 |
| 2921   | CXCL3     | 1308.205009 | 201.9012954  | 0.006884058 |
| 284244 | LOC284244 | 1310.477241 | 51.88817753  | 0.007349398 |
| 6210   | RPS15A    | 1311.006183 | 15346.81156  | 0.007331731 |
| 18     | ABAT      | 1314.169084 | 659.8320297  | 0.007553957 |
| 26001  | RNF167    | 1314.554416 | 223.3657301  | 0.007535885 |
| 10153  | CEBPZ     | 1314.910654 | -52.40708212 | 0.011924119 |
| 1499   | CTNNB1    | 1314.942111 | -47.26593373 | 0.011891892 |
| 87178  | PNPT1     | 1318.365214 | -161.1411175 | 0.011994609 |
| 70     | ACTC1     | 1319.682708 | -191.3916291 | 0.011962366 |
| 83416  | FCRL5     | 1320.935623 | 119.5706852  | 0.007637232 |
| 23270  | TSPYL4    | 1321.170119 | 457.9605532  | 0.007619048 |
| 151246 | SGOL2     | 1323.02346  | -96.70109246 | 0.012198391 |
| 54101  | RIPK4     | 1323.581227 | 549.6722968  | 0.007719715 |
| 171024 | SYNP02    | 1323.792848 | -4143.593405 | 0.012299465 |
| 58527  | C6orf115  | 1324.168189 | 740.2280072  | 0.012266667 |
| 253827 | MSRB3     | 1324.217619 | -5086.856604 | 0.012234043 |
| 403313 | PPAPDC2   | 1325.940614 | 241.0708466  | 0.007819905 |
| 1786   | DNMT1     | 1327.791734 | 108.3076196  | 0.012334218 |
| 3169   | FOXA1     | 1328.944931 | 328.3602658  | 0.008274232 |
| 29901  | SAC3D1    | 1329.439927 | -12.50479954 | 0.012301587 |
| 7639   | ZNF85     | 1330.497249 | 209.5928693  | 0.008372642 |
| 1509   | CTSD      | 1332.956939 | 241.104488   | 0.012401055 |
| 10265  | IRX5      | 1333.353684 | 49.43479956  | 0.008920188 |

|        |           |             |              |             |
|--------|-----------|-------------|--------------|-------------|
| 79902  | NUP85     | 1334.570324 | 109.9283397  | 0.012631579 |
| 1603   | DAD1      | 1335.722712 | 1580.6755    | 0.009250585 |
| 339168 | TMEM95    | 1336.093234 | 7.699744763  | 0.009228972 |
| 6525   | SMTN      | 1337.480761 | -3417.923519 | 0.013254593 |
| 9260   | PDLIM7    | 1337.896855 | -205.7051095 | 0.013350785 |
| 8935   | SKAP2     | 1339.481462 | -339.357928  | 0.013315927 |
| 7247   | TSN       | 1340.438861 | 17.78249706  | 0.013541667 |
| 90488  | C12orf23  | 1340.729754 | 313.5579109  | 0.009207459 |
| 125704 | FAM69C    | 1340.974914 | 25.8531383   | 0.009186047 |
| 6950   | TCP1      | 1341.60603  | -126.9217735 | 0.013636364 |
| 254295 | PHYHD1    | 1343.602944 | 132.798941   | 0.00974478  |
| 51527  | C14orf129 | 1343.955544 | 223.7307558  | 0.009722222 |
| 153562 | MARVELD2  | 1344.380855 | 435.9192677  | 0.009815242 |
| 83449  | PMFBP1    | 1345.770184 | -0.866903077 | 0.013953488 |
| 8416   | ANXA9     | 1346.220649 | 284.1923156  | 0.013917526 |
| 3479   | IGF1      | 1346.710948 | -152.6744248 | 0.014010283 |
| 11004  | KIF2C     | 1347.178168 | -84.38371061 | 0.013974359 |
| 79709  | GLT25D1   | 1347.828386 | -61.84324852 | 0.013938619 |
| 84316  | LSMD1     | 1350.115825 | 190.2618803  | 0.014030612 |
| 84870  | RSP03     | 1351.35275  | -898.0458677 | 0.013994911 |
| 9218   | VAPA      | 1352.04952  | 287.3726775  | 0.010023041 |
| 51061  | TXNDC11   | 1352.247263 | 461.2890538  | 0.01        |
| 10484  | SEC23A    | 1352.382432 | -888.0162961 | 0.014086294 |
| 22875  | ENPP4     | 1353.215947 | 54.64370575  | 0.009977064 |
| 6935   | ZEB1      | 1353.36817  | -1286.057867 | 0.014177215 |
| 79070  | KDELC1    | 1353.914761 | -25.06355854 | 0.014141414 |
| 4605   | MYBL2     | 1354.303824 | -72.82265683 | 0.014357683 |
| 56954  | NIT2      | 1354.668398 | 267.2097822  | 0.014447236 |
| 1486   | CTBS      | 1356.663941 | 280.8397092  | 0.010297483 |
| 116372 | LYPD1     | 1357.033225 | 18.10171752  | 0.014786967 |
| 2690   | GHR       | 1358.030119 | 57.6400641   | 0.010273973 |
| 10650  | SLM01     | 1358.45228  | -7.552011113 | 0.014875    |
| 259266 | ASPM      | 1359.336436 | -48.12637847 | 0.015087282 |
| 91624  | NEXN      | 1360.208025 | -328.5681996 | 0.015049751 |
| 10112  | KIF20A    | 1360.874011 | -86.4717844  | 0.015260546 |
| 57189  | KIAA1147  | 1361.097531 | 384.6678897  | 0.010364465 |
| 414    | ARSD      | 1361.123968 | 300.6681956  | 0.010340909 |
| 56670  | SUCNR1    | 1361.36236  | -26.35441113 | 0.015346535 |
| 57476  | GRAMD1B   | 1361.971768 | 167.5405703  | 0.010430839 |
| 597    | BCL2A1    | 1362.135913 | 114.6364564  | 0.015308642 |
| 9976   | CLEC2B    | 1362.467898 | 428.0606231  | 0.015270936 |
| 1153   | CIRBP     | 1363.237207 | 1035.953606  | 0.010746606 |
| 4782   | NFIC      | 1366.479546 | 188.3125072  | 0.011060948 |
| 63976  | PRDM16    | 1367.316566 | 139.1553526  | 0.011036036 |

|        |          |             |              |             |
|--------|----------|-------------|--------------|-------------|
| 64951  | MRPS24   | 1367.429159 | 1320.70523   | 0.011011236 |
| 79153  | GDPD3    | 1368.163764 | 144.7937977  | 0.010986547 |
| 10213  | PSMD14   | 1369.67525  | -185.3454618 | 0.016339066 |
| 6139   | RPL17    | 1369.800042 | 11149.40521  | 0.011185682 |
| 118429 | ANTXR2   | 1370.013218 | -1083.665534 | 0.01629902  |
| 64859  | OBFC2A   | 1370.976165 | 90.58729895  | 0.016259169 |
| 55048  | VPS37C   | 1371.312438 | 332.2106553  | 0.011272321 |
| 6631   | SNRPC    | 1372.524629 | 280.5899226  | 0.016463415 |
| 6464   | SHC1     | 1373.023215 | 194.1220892  | 0.016423358 |
| 81669  | CCNL2    | 1373.035568 | -0.101389057 | 0.016383495 |
| 6159   | RPL29    | 1373.053723 | 6820.052049  | 0.016464891 |
| 10969  | EBNA1BP2 | 1375.001025 | 681.9380959  | 0.016545894 |
| 57124  | CD248    | 1376.583236 | -73.65949564 | 0.016987952 |
| 10105  | PPIF     | 1376.67775  | 363.387885   | 0.011804009 |
| 10643  | IGF2BP3  | 1376.935545 | -44.77385094 | 0.016947115 |
| 9768   | KIAA0101 | 1377.29768  | -170.1677774 | 0.017026379 |
| 30061  | SLC40A1  | 1378.770924 | 1029.855028  | 0.017105263 |
| 80114  | BICC1    | 1379.640548 | -87.52790192 | 0.017064439 |
| 23169  | SLC35D1  | 1379.720084 | 118.1404461  | 0.012222222 |
| 127707 | KLHDC7A  | 1380.145342 | 40.93983741  | 0.012305987 |
| 3727   | JUND     | 1380.713615 | 246.5726645  | 0.012389381 |
| 9784   | SNX17    | 1380.844339 | 287.8953421  | 0.017142857 |
| 4332   | MNDA     | 1381.915247 | 156.5895518  | 0.017220903 |
| 25831  | HECTD1   | 1383.418831 | 674.4065079  | 0.012472406 |
| 196463 | PLBD2    | 1383.958953 | 23.41191325  | 0.017654028 |
| 930    | CD19     | 1385.205347 | 519.7086932  | 0.012665198 |
| 51386  | EIF3L    | 1385.291662 | 475.4188868  | 0.012637363 |
| 5327   | PLAT     | 1386.395421 | 1898.451065  | 0.012609649 |
| 683    | BST1     | 1386.424809 | 20.71126779  | 0.017730496 |
| 10279  | PRSS16   | 1387.030739 | 95.36942914  | 0.012800875 |
| 6772   | STAT1    | 1387.072345 | 178.7622312  | 0.017924528 |
| 7737   | RNF113A  | 1387.178401 | 1447.071749  | 0.012772926 |
| 3738   | KCNA3    | 1388.046492 | 196.1832076  | 0.012745098 |
| 9510   | ADAMTS1  | 1389.802544 | 498.7933972  | 0.012717391 |
| 8842   | PROM1    | 1390.058901 | -37.67043564 | 0.018470588 |
| 6176   | RPLP1    | 1391.175699 | 27249.96476  | 0.018661972 |
| 2151   | F2RL2    | 1392.285584 | -97.60865066 | 0.018852459 |
| 533    | ATP6V0B  | 1393.278688 | 755.6149384  | 0.013232104 |
| 23158  | TBC1D9   | 1394.052675 | 361.6497761  | 0.013203463 |
| 858    | CAV2     | 1394.836153 | -819.8741091 | 0.018808411 |
| 83939  | EIF2A    | 1396.027194 | 298.9413578  | 0.013822894 |
| 4929   | NR4A2    | 1396.584015 | 237.1778523  | 0.013793103 |
| 2149   | F2R      | 1397.006134 | -70.72072088 | 0.019114219 |
| 6146   | RPL22    | 1398.20241  | 538.3426342  | 0.019186047 |

|        |         |             |              |             |
|--------|---------|-------------|--------------|-------------|
| 332    | BIRC5   | 1398.448369 | -64.9036726  | 0.019257541 |
| 11260  | XPOT    | 1399.007968 | -137.5898691 | 0.019212963 |
| 7431   | VIM     | 1399.354861 | 31089.25053  | 0.019284065 |
| 58189  | WFDC1   | 1400.758983 | -437.1081046 | 0.014516129 |
| 4700   | NDUFA6  | 1400.943095 | -231.2180141 | 0.014484979 |
| 253558 | LCLAT1  | 1401.523563 | -73.26521971 | 0.019700461 |
| 7705   | ZNF146  | 1402.50862  | -187.6748066 | 0.019885057 |
| 2778   | GNAS    | 1404.307628 | 4756.207833  | 0.014561028 |
| 1012   | CDH13   | 1404.769957 | 209.9918586  | 0.020183486 |
| 64710  | NUCKS1  | 1405.234901 | -132.0928413 | 0.020251716 |
| 8470   | SORBS2  | 1405.92393  | 228.3823567  | 0.014850427 |
| 27101  | CACYBP  | 1406.303508 | -59.14317772 | 0.020319635 |
| 256586 | LYSMD2  | 1407.840962 | 276.8815038  | 0.02095672  |
| 1576   | CYP3A4  | 1409.434148 | 2678.195309  | 0.015565032 |
| 113263 | GLCCI1  | 1409.876592 | 469.8435539  | 0.015638298 |
| 1535   | CYBA    | 1410.345545 | 64.53020765  | 0.021136364 |
| 221294 | NT5DC1  | 1410.468463 | 217.2561679  | 0.015711253 |
| 54971  | BANP    | 1411.158694 | -92.81118303 | 0.021088435 |
| 50848  | F11R    | 1411.885778 | 1402.211677  | 0.015783898 |
| 51514  | DTL     | 1412.175692 | -76.79372826 | 0.021266968 |
| 6167   | RPL37   | 1412.607182 | 13469.12904  | 0.015856237 |
| 140609 | NEK7    | 1413.969272 | -82.90183805 | 0.021331828 |
| 55711  | FAR2    | 1414.524929 | -30.01057723 | 0.021283784 |
| 5707   | PSMD1   | 1414.723743 | -221.0823544 | 0.021235955 |
| 7277   | TUBA4A  | 1416.276585 | 164.68756    | 0.021412556 |
| 9056   | SLC7A7  | 1416.294816 | 303.9679353  | 0.021364653 |
| 2620   | GAS2    | 1416.418752 | 191.6560013  | 0.016350211 |
| 2673   | GFPT1   | 1420.124646 | 339.6972685  | 0.016947368 |
| 1178   | CLC     | 1420.202447 | 72.39756072  | 0.016911765 |
| 1000   | CDH2    | 1422.273667 | 1884.913766  | 0.017400419 |
| 64151  | NCAPG   | 1422.879154 | -58.85135756 | 0.022544643 |
| 145270 | PRIMA1  | 1424.258279 | -44.50751484 | 0.017364017 |
| 5496   | PPM1G   | 1425.678576 | -24.00925016 | 0.023385301 |
| 2195   | FAT1    | 1426.161385 | -50.17600789 | 0.023333333 |
| 25797  | QPCT    | 1426.58057  | 47.38521341  | 0.023281596 |
| 10483  | SEC23B  | 1427.58453  | 249.8604622  | 0.017954071 |
| 79101  | TAF1D   | 1430.138742 | 36.16069452  | 0.023451327 |
| 6400   | SEL1L   | 1431.520501 | 196.4096572  | 0.0184375   |
| 26751  | SH3YL1  | 1431.535014 | 1817.510637  | 0.018399168 |
| 81621  | KAZALD1 | 1433.799333 | 445.6675353  | 0.018672199 |
| 4692   | NDN     | 1434.335499 | -180.4531353 | 0.02384106  |
| 56925  | LXN     | 1434.693433 | 3459.48915   | 0.023898678 |
| 10637  | LEFTY1  | 1435.899135 | 575.842607   | 0.023956044 |
| 1843   | DUSP1   | 1436.520754 | -7062.935529 | 0.019047619 |

|        |           |             |              |             |
|--------|-----------|-------------|--------------|-------------|
| 4666   | NACA      | 1437.341315 | 12782.48401  | 0.01911157  |
| 9167   | COX7A2L   | 1439.299996 | 924.6272068  | 0.019381443 |
| 91663  | MYADM     | 1439.524657 | 301.8095098  | 0.024890351 |
| 7342   | UBP1      | 1440.306146 | -28.48475856 | 0.024835886 |
| 7311   | UBA52     | 1441.513458 | 8657.665903  | 0.025       |
| 139596 | UPRT      | 1443.044739 | 160.4172041  | 0.020164609 |
| 9446   | GSTO1     | 1444.687356 | 853.0002373  | 0.025272331 |
| 10797  | MTHFD2    | 1444.978516 | 36.86951476  | 0.025217391 |
| 360    | AQP3      | 1447.316259 | 153.1486198  | 0.021516393 |
| 50865  | HEBP1     | 1447.979764 | 1235.358855  | 0.021472393 |
| 3575   | IL7R      | 1448.820787 | 2148.061532  | 0.025813449 |
| 27430  | MAT2B     | 1449.280352 | 386.7794069  | 0.021734694 |
| 9144   | SYNGR2    | 1449.459038 | 2039.792586  | 0.025757576 |
| 7280   | TUBB2A    | 1449.934092 | -127.8063694 | 0.025809935 |
| 6863   | TAC1      | 1450.615003 | -1.104659486 | 0.02575431  |
| 58508  | MLL3      | 1450.726651 | 409.1773512  | 0.021995927 |
| 1063   | CENPF     | 1450.879586 | -48.47163592 | 0.025698925 |
| 5121   | PCP4      | 1450.958803 | -2063.825963 | 0.025751073 |
| 203100 | HTRA4     | 1451.477832 | -40.54942988 | 0.025910064 |
| 5355   | PLP2      | 1452.822302 | 268.7286787  | 0.026495726 |
| 948    | CD36      | 1453.826952 | 118.2456719  | 0.022256098 |
| 9086   | EIF1AY    | 1453.846502 | 30.07687361  | 0.022210953 |
| 59084  | ENPP5     | 1454.772678 | 138.6452533  | 0.022267206 |
| 1558   | CYP2C8    | 1454.968594 | 249.2654475  | 0.022323232 |
| 164832 | LONRF2    | 1457.720641 | -380.691781  | 0.022635815 |
| 22983  | MAST1     | 1458.287649 | 66.31275081  | 0.022791165 |
| 5245   | PHB       | 1458.353842 | -88.02765836 | 0.02782516  |
| 23710  | GABARAPL1 | 1458.417703 | -97.92084707 | 0.022745491 |
| 25977  | NECAP1    | 1458.746877 | 145.7666007  | 0.0227      |
| 148811 | PM20D1    | 1459.134112 | 52.80390162  | 0.022754491 |
| 10635  | RAD51AP1  | 1459.420318 | -116.5192114 | 0.028085106 |
| 84662  | GLIS2     | 1460.014419 | 269.9226813  | 0.028025478 |
| 7262   | PHLDA2    | 1460.59665  | -9.943863766 | 0.028072034 |
| 545    | ATR       | 1461.128798 | 148.4077125  | 0.028012685 |
| 64764  | CREB3L2   | 1461.538831 | 554.8623455  | 0.023007968 |
| 4254   | KITLG     | 1462.07704  | 193.1858074  | 0.02306163  |
| 5468   | PPARG     | 1462.520613 | -15.23881153 | 0.023115079 |
| 58528  | RRAGD     | 1463.224001 | -60.27113475 | 0.028270042 |
| 4710   | NDUFB4    | 1464.023689 | -1541.437852 | 0.023267327 |
| 169841 | ZNF169    | 1464.292324 | 151.3363359  | 0.023221344 |
| 3688   | ITGB1     | 1464.331106 | -270.8962352 | 0.028315789 |
| 64981  | MRPL34    | 1465.180322 | 693.8784905  | 0.023274162 |
| 23212  | RRS1      | 1465.827788 | -13.08403807 | 0.028466387 |
| 197370 | NSMCE1    | 1466.553511 | -163.6109512 | 0.028406709 |

|        |           |             |              |             |
|--------|-----------|-------------|--------------|-------------|
| 51602  | NOP58     | 1467.280016 | 1777.891304  | 0.028661088 |
| 338    | APOB      | 1467.660782 | 1469.436834  | 0.023720472 |
| 79094  | CHAC1     | 1467.97297  | 102.8915223  | 0.023772102 |
| 57475  | PLEKHH1   | 1468.266607 | 113.2186189  | 0.02372549  |
| 220963 | SLC16A9   | 1468.672164 | 42.5591136   | 0.023776908 |
| 5036   | PA2G4     | 1468.729053 | 598.8735981  | 0.029227557 |
| 64816  | CYP3A43   | 1469.120768 | 698.0012258  | 0.023828125 |
| 976    | CD97      | 1469.122793 | 1133.20122   | 0.029166667 |
| 11135  | CDC42EP1  | 1470.079753 | 4491.831635  | 0.023879142 |
| 3065   | HDAC1     | 1472.174804 | 875.6607445  | 0.02962578  |
| 3178   | HNRNPA1   | 1472.615715 | 2438.048488  | 0.024027237 |
| 25875  | LETMD1    | 1472.995776 | 642.5962773  | 0.023980583 |
| 64318  | NOC3L     | 1474.668323 | 39.83770503  | 0.02966805  |
| 8905   | AP1S2     | 1474.770062 | -216.1202779 | 0.029606625 |
| 6274   | S100A3    | 1475.879906 | -16.15630983 | 0.02964876  |
| 9900   | SV2A      | 1475.902393 | -47.71569352 | 0.029587629 |
| 7803   | PTP4A1    | 1476.345771 | 22.48205603  | 0.024612403 |
| 29997  | GLTSCR2   | 1476.576741 | 6231.860183  | 0.024564797 |
| 2519   | FUCA2     | 1477.495068 | -4.348139367 | 0.029835391 |
| 2647   | BLOC1S1   | 1477.635384 | 393.2354635  | 0.024517375 |
| 57717  | PCDHB16   | 1477.707616 | -14.25952329 | 0.029774127 |
| 4973   | OLR1      | 1477.853945 | -9.196704293 | 0.029713115 |
| 92840  | REEP6     | 1477.938505 | 485.365884   | 0.029591837 |
| 23554  | TSPAN12   | 1478.315979 | 267.0771702  | 0.024759152 |
| 587    | BCAT2     | 1478.71805  | 500.4569313  | 0.024807692 |
| 27289  | RND1      | 1480.211093 | 115.7548402  | 0.025047985 |
| 23658  | LSM5      | 1480.366557 | 92.85607143  | 0.030040733 |
| 865    | CBFB      | 1481.212678 | 328.6908504  | 0.030081301 |
| 4640   | MYO1A     | 1483.03439  | 31.11370997  | 0.025383142 |
| 9802   | DAZAP2    | 1483.037056 | 2480.535208  | 0.025334608 |
| 375295 | LOC375295 | 1483.408788 | 8.372316254  | 0.030769231 |
| 57493  | HEG1      | 1484.415181 | 384.5919289  | 0.031111111 |
| 199713 | NLRP7     | 1484.796731 | 52.01940039  | 0.025763359 |
| 79853  | TM4SF20   | 1485.274813 | -22.48156445 | 0.03125     |
| 9284   | NPIP      | 1485.467049 | -88.52935867 | 0.031488934 |
| 54874  | FNBP1L    | 1487.001952 | 401.6066178  | 0.026380952 |
| 6745   | SSR1      | 1487.09173  | 850.3366992  | 0.026425856 |
| 1340   | COX6B1    | 1487.257531 | 980.1602497  | 0.031863727 |
| 55061  | SUSD4     | 1488.176224 | -5.665999097 | 0.026565465 |
| 54842  | MFSD6     | 1488.89521  | -87.78793117 | 0.026515152 |
| 998    | CDC42     | 1489.304053 | 212.7069962  | 0.0319      |
| 2621   | GAS6      | 1489.465643 | 239.0549506  | 0.026559546 |
| 780    | DDR1      | 1490.081814 | 155.4390655  | 0.026792453 |
| 2108   | ETFA      | 1490.935483 | -44.9282727  | 0.027024482 |

|        |           |             |              |             |
|--------|-----------|-------------|--------------|-------------|
| 4645   | MY05B     | 1491.462866 | 144.5852145  | 0.027067669 |
| 51162  | EGFL7     | 1491.899098 | 592.696682   | 0.032335329 |
| 7347   | UCLH3     | 1491.904059 | -154.7426466 | 0.032270916 |
| 27335  | EIF3K     | 1492.417091 | 180.9985603  | 0.03250497  |
| 6352   | CCL5      | 1493.498746 | 235.1653462  | 0.032738095 |
| 10096  | ACTR3     | 1493.867486 | -178.2837323 | 0.032871287 |
| 10542  | HBXIP     | 1495.785572 | 479.2491349  | 0.028330206 |
| 54915  | YTHDF1    | 1495.85619  | 65.47241672  | 0.033234714 |
| 85462  | FHDC1     | 1496.442741 | 112.6998113  | 0.028651685 |
| 57530  | CGN       | 1496.95335  | 1110.011971  | 0.028691589 |
| 23196  | FAM120A   | 1497.926782 | 356.7735616  | 0.02891791  |
| 3398   | ID2       | 1498.689879 | 1697.773332  | 0.033759843 |
| 8540   | AGPS      | 1498.756971 | 4.431965789  | 0.033791749 |
| 23204  | ARL6IP1   | 1499.101209 | 137.769704   | 0.033823529 |
| 3069   | HDLBP     | 1499.662705 | 519.2604105  | 0.029608939 |
| 23560  | GTPBP4    | 1499.771543 | -51.81645372 | 0.033953033 |
| 1287   | COL4A5    | 1500.020725 | -5875.195028 | 0.029553903 |
| 489    | ATP2A3    | 1501.05513  | 152.5525795  | 0.029777365 |
| 6039   | RNASE6    | 1501.226703 | 27.74827637  | 0.034375    |
| 11221  | DUSP10    | 1501.239173 | -1.732212066 | 0.034307992 |
| 4188   | MDFI      | 1501.249735 | 95.08465715  | 0.034241245 |
| 290    | ANPEP     | 1501.455937 | -221.8006734 | 0.034174757 |
| 50509  | COL5A3    | 1501.551125 | -32.14550741 | 0.034108527 |
| 80223  | RAB11FIP1 | 1501.772952 | 228.7159582  | 0.029814815 |
| 4330   | MN1       | 1502.029587 | -96.77834092 | 0.034139265 |
| 114908 | TMEM123   | 1502.101214 | 1078.723378  | 0.034073359 |
| 10234  | LRRC17    | 1502.59955  | 146.9343073  | 0.029944547 |
| 84293  | C10orf58  | 1502.932327 | -93.61210943 | 0.034489403 |
| 259239 | WFDC11    | 1504.574188 | 4.823547862  | 0.030073801 |
| 4170   | MCL1      | 1505.457297 | 482.631815   | 0.035       |
| 5139   | PDE3A     | 1505.598666 | -36.77621259 | 0.035028791 |
| 222643 | UNC5CL    | 1506.711812 | 152.4873553  | 0.030294659 |
| 113130 | CDCA5     | 1507.01405  | -78.48534149 | 0.035153257 |
| 223    | ALDH9A1   | 1507.343638 | 235.2365713  | 0.030183486 |
| 57405  | SPC25     | 1508.396153 | -62.52065934 | 0.035564054 |
| 54210  | TREM1     | 1508.654334 | -32.82998848 | 0.035687023 |
| 24146  | CLDN15    | 1508.945121 | -84.35827842 | 0.035619048 |
| 594    | BCKDHB    | 1509.224917 | 120.2193087  | 0.030494505 |
| 9902   | MRC2      | 1509.548947 | 2371.017792  | 0.035646388 |
| 6629   | SNRPB2    | 1509.787837 | 193.7671699  | 0.035673624 |
| 10135  | NAMPT     | 1510.597155 | 415.8143476  | 0.030530165 |
| 84918  | LRP11     | 1512.171185 | -216.0993366 | 0.036079545 |
| 8655   | DYNLL1    | 1513.254053 | -736.7462456 | 0.03610586  |
| 84327  | ZBED3     | 1514.326409 | 762.9393257  | 0.031386861 |



|        |          |             |              |             |
|--------|----------|-------------|--------------|-------------|
| 890    | CCNA2    | 1515.069371 | -76.77847978 | 0.036320755 |
| 9136   | RRP9     | 1515.455968 | 110.5776085  | 0.036252354 |
| 84933  | C8orf76  | 1518.219603 | -24.55855754 | 0.036842105 |
| 1580   | CYP4B1   | 1518.406891 | 112.8108581  | 0.032240437 |
| 3918   | LAMC2    | 1518.887736 | 19.63655983  | 0.036866792 |
| 677    | ZFP36L1  | 1518.918709 | -382.6985292 | 0.036797753 |
| 1471   | CST3     | 1519.509304 | 1620.89871   | 0.032454545 |
| 11067  | C10orf10 | 1519.82649  | 3153.147547  | 0.037196262 |
| 9352   | TXNL1    | 1519.976569 | 536.9767233  | 0.032667877 |
| 1811   | SLC26A3  | 1521.822328 | 6.517207718  | 0.032820976 |
| 9045   | RPL14    | 1521.856101 | 18734.32032  | 0.032761733 |
| 2893   | GRIA4    | 1522.346282 | 38.3528458   | 0.032702703 |
| 158405 | KIAA1958 | 1523.040136 | 83.83475409  | 0.032733813 |
| 9493   | KIF23    | 1523.416329 | -28.64144107 | 0.037686567 |
| 63928  | CHP2     | 1525.038832 | -8.756660178 | 0.033034111 |
| 10418  | SPON1    | 1526.367172 | -1763.127057 | 0.037988827 |
| 84823  | LMNB2    | 1526.903375 | -94.15134699 | 0.038011152 |
| 1062   | CENPE    | 1527.556692 | -55.31440277 | 0.03812616  |
| 771    | CA12     | 1527.880186 | 46.53528277  | 0.033781362 |
| 5999   | RGS4     | 1528.562179 | 13144.44605  | 0.038425926 |
| 11100  | HNRNPUL1 | 1528.950115 | 304.3509748  | 0.03844732  |
| 55737  | VPS35    | 1529.664592 | 1126.939059  | 0.034168157 |
| 9231   | DLG5     | 1530.059402 | -316.9106794 | 0.038560886 |
| 65985  | AACS     | 1530.245698 | 141.8516849  | 0.034107143 |
| 5094   | PCBP2    | 1530.479176 | 1502.603138  | 0.034046346 |
| 5885   | RAD21    | 1530.586861 | 192.0307492  | 0.038674033 |
| 11057  | ABHD2    | 1530.660267 | 127.0027295  | 0.033985765 |
| 84722  | PSRC1    | 1531.27396  | -128.2503527 | 0.038878676 |
| 51301  | GCNT4    | 1531.963659 | 10.05841666  | 0.034042553 |
| 1593   | CYP27A1  | 1532.101429 | 3171.311407  | 0.038990826 |
| 128866 | CHMP4B   | 1532.806599 | -175.712092  | 0.039010989 |
| 55859  | BEX1     | 1533.466461 | 485.3254659  | 0.034424779 |
| 56992  | KIF15    | 1533.53864  | -47.91724702 | 0.039213894 |
| 5595   | MAPK3    | 1534.19569  | 165.2141766  | 0.034452297 |
| 9122   | SLC16A4  | 1534.489317 | 627.1370702  | 0.039507299 |
| 7052   | TGM2     | 1534.846657 | -113.5533367 | 0.039526412 |
| 1111   | CHEK1    | 1535.014567 | -54.05190158 | 0.039454545 |
| 56906  | THAP10   | 1536.413197 | 179.7950951  | 0.035097002 |
| 3689   | ITGB2    | 1537.794681 | 1357.274383  | 0.040199637 |
| 123920 | CMTM3    | 1538.658791 | 1308.876567  | 0.040307971 |
| 128153 | SPATA17  | 1538.912028 | 4.893041979  | 0.040235081 |
| 5184   | PEPD     | 1539.015157 | 1112.394929  | 0.040162455 |
| 55695  | NSUN5    | 1539.930964 | 145.0471061  | 0.04036036  |
| 3119   | HLA-DQB1 | 1540.970082 | 1113.214225  | 0.040467626 |

|        |          |             |              |             |
|--------|----------|-------------|--------------|-------------|
| 85437  | ZCRB1    | 1541.79155  | 28.49059519  | 0.036707746 |
| 4259   | MGST3    | 1541.871011 | -123.3806414 | 0.036643234 |
| 23167  | EFR3A    | 1542.928463 | -247.5403378 | 0.041113106 |
| 6698   | SPRR1A   | 1543.416795 | 33.80615395  | 0.036754386 |
| 389792 | IER5L    | 1543.704228 | 137.4668945  | 0.041308244 |
| 10273  | STUB1    | 1544.336559 | 891.9677666  | 0.03704028  |
| 6370   | CCL25    | 1544.368325 | -13.42881891 | 0.036975524 |
| 80328  | ULBP2    | 1544.469529 | -37.59300153 | 0.041413238 |
| 55608  | ANKRD10  | 1544.517388 | 203.3709129  | 0.041339286 |
| 23228  | PLCL2    | 1545.463007 | 131.8020864  | 0.037172775 |
| 64123  | ELTD1    | 1546.186058 | 149.2734795  | 0.041800357 |
| 9369   | NRXN3    | 1546.605428 | -84.30734053 | 0.041725979 |
| 341640 | FREM2    | 1547.722859 | 103.307824   | 0.037979094 |
| 55240  | STEAP3   | 1548.125399 | 210.1995198  | 0.038173913 |
| 4000   | LMNA     | 1550.22246  | 1086.28976   | 0.042717584 |
| 8237   | USP11    | 1550.384567 | 337.4030233  | 0.042819149 |
| 375056 | MIA3     | 1550.471365 | 200.548761   | 0.038888889 |
| 4436   | MSH2     | 1550.54794  | 110.2680646  | 0.042743363 |
| 65065  | NBEAL1   | 1550.924077 | 87.43604054  | 0.038908146 |
| 2523   | FUT1     | 1551.21314  | 214.3193803  | 0.03884083  |
| 11272  | PRR4     | 1551.373947 | -28.76127836 | 0.042844523 |
| 51192  | CKLF     | 1551.724305 | 164.4768103  | 0.042857143 |
| 283208 | P4HA3    | 1552.614496 | -24.12361553 | 0.042957746 |
| 5230   | PGK1     | 1555.345222 | 521.7768414  | 0.043585237 |
| 51020  | HDHC2    | 1555.600529 | 224.9813641  | 0.039982729 |
| 2872   | MKNK2    | 1556.367139 | 2134.611853  | 0.04        |
| 9951   | HS3ST4   | 1558.611288 | 60.7582049   | 0.040619621 |
| 51009  | DERL2    | 1560.597638 | 382.9015028  | 0.041408935 |
| 953    | ENTPD1   | 1560.741756 | -156.6829722 | 0.045526316 |
| 8611   | PPAP2A   | 1561.547601 | -546.3519324 | 0.045621716 |
| 51110  | LACTB2   | 1562.050984 | -9.990525025 | 0.045629371 |
| 57447  | NDRG2    | 1562.62377  | 5493.210577  | 0.042367067 |
| 5782   | PTPN12   | 1563.521727 | 1027.661975  | 0.046160558 |
| 284266 | SIGLEC15 | 1563.783609 | -33.09173484 | 0.04255137  |
| 83935  | TMEM133  | 1565.132926 | 368.9283144  | 0.042735043 |
| 348262 | FAM195B  | 1566.009101 | 813.6630788  | 0.046689895 |
| 27020  | NPTN     | 1566.146031 | -490.1487005 | 0.046695652 |
| 79981  | FRMD1    | 1566.433627 | 84.50777032  | 0.04334471  |
| 84518  | CNFN     | 1566.869456 | 111.1118443  | 0.046875    |
| 92922  | CCDC102A | 1567.194891 | 79.29342054  | 0.046793761 |
| 1644   | DDC      | 1567.678893 | 2.152732467  | 0.046712803 |
| 63027  | SLC22A23 | 1569.335785 | 101.4227853  | 0.044037479 |
| 285761 | DCBLD1   | 1570.134623 | -65.57365432 | 0.047495682 |
| 285203 | C3orf64  | 1570.641148 | -160.6891944 | 0.047758621 |

|        |           |             |              |             |
|--------|-----------|-------------|--------------|-------------|
| 1466   | CSRP2     | 1572.549973 | -5391.494814 | 0.04827883  |
| 83481  | EPPK1     | 1575.651759 | -73.09046566 | 0.048797251 |
| 2146   | EZH2      | 1576.168749 | 20.80496015  | 0.04897084  |
| 285095 | LOC285095 | 1576.97985  | 4.146830575  | 0.046604414 |
| 9223   | MAGI1     | 1577.825704 | 131.0926481  | 0.046694915 |
| 93974  | ATPIF1    | 1578.765118 | 1824.908847  | 0.047123519 |
| 7184   | HSP90B1   | 1580.572978 | 6419.145765  | 0.047639123 |
| 10575  | CCT4      | 1580.653651 | 1768.460647  | 0.049828767 |
| 7105   | TSPAN6    | 1581.011694 | 778.2177899  | 0.047727273 |
| 9499   | MYOT      | 1581.092004 | -9.877374421 | 0.047647059 |
| 84504  | NKX6-2    | 1581.312914 | 6.817338782  | 0.047651007 |
| 2274   | FHL2      | 1581.336863 | -895.5021136 | 0.04982906  |

---
